1  
2  
3  
4  
5  
6  
7  
8  
9  
10  
11  
12  
13  
14  
15  
16  
17  
18  
19

# **Intermittent Ca<sup>2+</sup> signals mediated by Orai1 regulate basal T cell motility**

Tobias X. Dong<sup>1,2</sup>, Shivashankar Othy<sup>1,2</sup>, Milton L. Greenberg<sup>1</sup>, Amit Jairaman<sup>1</sup>, Chijioke Akunwafo<sup>1</sup>, Sabrina Leverrier<sup>1</sup>, Ying Yu<sup>1</sup>, Ian Parker<sup>1,3</sup>, Joseph L. Dynes<sup>1</sup>, and Michael D. Cahalan<sup>1,4</sup>

<sup>1</sup>Department of Physiology and Biophysics, University of California, 285 Irvine Hall, Irvine, California 92697, USA.

<sup>2</sup>Co-first authors

<sup>3</sup>Department of Neurobiology & Behavior, University of California, McGaugh Hall, Irvine, California 92697, USA.

<sup>3</sup>Institute for Immunology, University of California, 285 Irvine Hall, Irvine, California 92697, USA.

\*Corresponding Author: Michael D. Cahalan ([mcahalan@uci.edu](mailto:mcahalan@uci.edu))

Key Words: T cell motility, Orai1, genetically encoded Ca<sup>2+</sup> indicator, Ca<sup>2+</sup> signaling, two-photon microscopy

20 **Abstract**

21  $\text{Ca}^{2+}$  influx through Orai1 channels is crucial for several T cell functions, but a role in  
22 regulating basal cellular motility has not been described. Here we show that inhibition of  
23 Orai1 channel activity increases average cell velocities by reducing the frequency of  
24 pauses in human T cells migrating through confined spaces, even in the absence of  
25 extrinsic cell contacts or antigen recognition. Utilizing a novel ratiometric genetically  
26 encoded cytosolic  $\text{Ca}^{2+}$  indicator, Salsa6f, which permits real-time monitoring of cytosolic  
27  $\text{Ca}^{2+}$  along with cell motility, we show that spontaneous pauses during T cell motility in  
28 vitro and in vivo coincide with episodes of cytosolic  $\text{Ca}^{2+}$  signaling. Furthermore, lymph  
29 node T cells exhibited two types of spontaneous  $\text{Ca}^{2+}$  transients: short-duration “sparkles”  
30 and longer duration global signals. Our results demonstrate that spontaneous and self-  
31 peptide MHC-dependent activation of Orai1 ensures random walk behavior in T cells to  
32 optimize immune surveillance.

33

34 To initiate the adaptive immune response, T cells must make direct contact with antigen-  
35 presenting cells (APCs) in the lymph node, enabling T cell receptors (TCRs) to engage  
36 peptide-bound MHC molecules presented on the APC surface. Because cognate  
37 antigens are rare for any given TCR, many APCs must be scanned to identify those  
38 bearing cognate antigens. Thus, optimizing T cell motility to balance search sensitivity,  
39 specificity, and speed is crucial for efficient antigen search and proper immune function  
40 (Cahalan and Parker 2005, Krummel, Bartumeus et al. 2016). Both cell-intrinsic and  
41 environmental factors have been proposed to regulate T cell motility within lymph nodes  
42 and peripheral tissues (Miller, Wei et al. 2002, Bousso and Robey 2003, Mempel,  
43 Henrickson et al. 2004, Mrass, Petravac et al. 2010). T cell motility in steady-state lymph  
44 nodes under homeostatic conditions, referred to as “basal motility”, has been likened to  
45 diffusive Brownian motion, resembling a “stop-and-go” random walk that results in an  
46 overall exploratory spread characterized by a linear mean-squared displacement over  
47 time (Miller, Wei et al. 2002). Subsequent studies defined a role of cellular cues in guiding  
48 T cell migration, such as contact with the lymph node stromal cell network or short-term  
49 encounters with resident dendritic cells (Miller, Hejazi et al. 2004, Bajenoff, Egen et al.  
50 2006, Khan, Headley et al. 2011). Whereas the basic signaling mechanisms for cell-  
51 intrinsic induction of random motility have been previously explored in fibroblasts and  
52 neuroblastoma cells (Petrie, Doyle et al. 2009), it remains unclear if such mechanisms  
53 apply in T cells.

54 Upon T cell recognition of cognate antigen, TCR engagement results in an  
55 elevated cytosolic  $Ca^{2+}$  concentration that acts as a “STOP” signal to halt motility and  
56 anchor the T cell to the site of antigen presentation (Donnadieu, Bismuth et al. 1994,

57 Negulescu, Krasieva et al. 1996, Dustin, Bromley et al. 1997, Bhakta, Oh et al. 2005,  
58 Moreau, Lemaitre et al. 2015). The predominant mechanism for increasing cytosolic  $Ca^{2+}$   
59 in T cells is through store-operated  $Ca^{2+}$  entry (SOCE), which is mediated by the  
60 molecular components STIM1 and Orai1. TCR stimulation triggers depletion of  
61 intracellular  $Ca^{2+}$  stores in the endoplasmic reticulum (ER), resulting in translocation of  
62 the ER-resident  $Ca^{2+}$  sensor STIM1 to specialized ER-plasma membrane (PM) junctions  
63 where Orai1 channels aggregate into puncta and activate to allow sustained  $Ca^{2+}$  influx  
64 (Liou, Kim et al. 2005, Roos, DiGregorio et al. 2005, Zhang, Yu et al. 2005, Luik, Wu et  
65 al. 2006, Vig, Beck et al. 2006, Zhang, Yeromin et al. 2006, Calloway, Vig et al. 2009,  
66 Wu, Covington et al. 2014). Orai1 channel activity is crucial for immune function, as  
67 human mutations in Orai1 result in severe combined immunodeficiency (SCID) (Feske,  
68 Gwack et al. 2006). Additional roles of Orai1 have been defined in chemotaxis to certain  
69 chemokines and T cell homing to lymph nodes (Greenberg, Yu et al. 2013); actin  
70 cytoskeleton rearrangement (Schaff, Dixit et al. 2010, Dixit, Yamayoshi et al. 2011,  
71 Babich and Burkhardt 2013, Hartzell, Jankowska et al. 2016); migration during shear flow  
72 (Schaff, Dixit et al. 2010, Dixit, Yamayoshi et al. 2011); lipid metabolism (Maus, Cuk et al.  
73 2017); and dendritic spine maturation in neurons (Korkotian, Oni-Biton et al. 2017).  
74 However, despite their contributions to other aspects of T cell function, no role has been  
75 identified for Orai1 channels in T cell motility patterns underlying scanning behavior.

76 In this study, we use human and mouse T cells to assess the role of Orai1 and  
77  $Ca^{2+}$  ions in regulating basal cell motility. Expression of a dominant-negative Orai1-E106A  
78 construct was used to block Orai1 channel activity in human T cells, both in vivo within  
79 immunodeficient mouse lymph nodes (Greenberg, Yu et al. 2013), and in vitro within

80 microfabricated polydimethylsiloxane (PDMS) chambers (Jacobelli, Friedman et al.  
81 2010). We use our genetically encoded Salsa6f tandem green/red fluorescent  $\text{Ca}^{2+}$   
82 indicator (**eLIFE submission # 29-09-2017-ISRA-eLife-32417**) to monitor spontaneous  
83  $\text{Ca}^{2+}$  signaling in human T cells migrating in confined microchannels in vitro. Finally, using  
84 a transgenic mouse strain expressing Salsa6f in  $\text{CD4}^+$  T cells, designated as CD4-  
85 Salsa6f<sup>+/+</sup> mice from here on, we show that  $\text{Ca}^{2+}$  signals occur in the absence of specific  
86 antigen as T cells crawl in the lymph node. Our results indicate that  $\text{Ca}^{2+}$  influx, activated  
87 intermittently through Orai1 channels, triggers spontaneous pauses during T cell motility  
88 and fine-tunes the random-walk search for cognate antigens.

## 89 **Results**

### 90 **Inhibition of Orai1 in human T cells using a dominant-negative construct**

91 To study the role of Orai1 channel activity in T cell motility, we transfected human T cells  
92 with the dominant-negative mutant Orai1-E106A to selectively eliminate ion conduction  
93 through the Orai1 pore. The glutamate residue at position 106 in human Orai1 forms the  
94 selectivity filter of the Orai1 pore (Prakriya, Feske et al. 2006, Vig, Beck et al. 2006,  
95 Yeromin, Zhang et al. 2006), and because the Orai1 channel is a functional hexamer  
96 (Hou, Pedi et al. 2012), mutation of E106 to neutrally charged alanine completely inhibits  
97  $\text{Ca}^{2+}$  permeation in a potent dominant-negative manner (Greenberg, Yu et al. 2013).  
98 Using Fura-2 based  $\text{Ca}^{2+}$  imaging, we confirmed Orai1 channel block by E106A in  
99 activated human T cells transfected with either eGFP-tagged Orai1-E106A or empty  
100 vector for control. Thapsigargin induced SOCE was greatly diminished in cells expressing  
101 eGFP-Orai1-E106A, referred to here as eGFP-E106<sup>hi</sup> T cells, compared to empty vector-  
102 transfected control cells (**Figure 1A**).  $\text{Ca}^{2+}$  entry was also partially inhibited in a population  
103 of transfected T cells with minimal eGFP fluorescence referred to as eGFP-E106A<sup>lo</sup> cells.  
104 To confirm that eGFP-E106A inhibits T cell activation, we challenged transfected human  
105 T cells with autologous dendritic cells pulsed with the superantigen Staphylococcal  
106 enterotoxin B (Lioudyno, Kozak et al. 2008). T cell proliferation was markedly suppressed  
107 in eGFP-E106A<sup>hi</sup> CD4<sup>+</sup> and CD8<sup>+</sup> T cells, but not in eGFP-E106A<sup>lo</sup> T cells (**Figure 1B**).  
108 This shows that the residual Orai1 channel activity in eGFP-E106A<sup>lo</sup> T cells is sufficient  
109 for T cell activation and proliferation. Taken together, these experiments show that eGFP-  
110 tagged Orai1-E106A expression can serve as a robust tool to assess cellular roles of

111 Orai1 channel activity, and that transfected cells without detectable eGFP fluorescence  
112 can be used as an internal control.

113 Orai1 function in human T cell motility was evaluated in vivo using a human  
114 xenograft model in which immunodeficient NOD.SCID.β2 mice were reconstituted with  
115 human peripheral blood lymphocytes, followed by imaging of excised lymph nodes using  
116 two-photon microscopy (Greenberg, Yu et al. 2013). Reconstitution has been shown to  
117 produce a high density of human immune cells within the lymph nodes of immunodeficient  
118 mice (Mosier, Gulizia et al. 1988), simulating the crowded migratory environment  
119 experienced by T cells under normal physiological conditions. Three weeks after  
120 reconstitution, human T cells were purified from the same donor, transfected, and  
121 adoptively transferred into the reconstituted NOD.SCID.β2 mice (**Figure 1-figure**  
122 **supplement 1**). Whereas control T cells transfected with eGFP showed robust  
123 expression and successfully homed to lymph nodes following adoptive transfer 24 hr post-  
124 transfection, eGFP-E106A transfected T cells did not home to lymph nodes in the same  
125 period, consistent with our previous study indicating that functional Orai1 channel activity  
126 is required for T cell homing to lymph nodes (Greenberg, Yu et al. 2013). To circumvent  
127 the homing defect, we injected eGFP-E106A transfected T cells only 3 hr post-  
128 transfection, before the expression level of eGFP-E106A had become sufficiently high to  
129 block lymph node entry (**Figure 1C**).

130

### 131 **Orai1 block increases human T cell motility within intact lymph node**

132 To evaluate Orai1 function in T cell motility, we imaged human T cells within intact lymph  
133 nodes of reconstituted NOD.SCID.β2 mice by two-photon microscopy (**Figure 2A**). We

134 found that eGFP-E106A<sup>hi</sup> T cells migrated with significantly higher average velocities than  
135 co-transferred, mock-transfected CMTMR-labeled T cells (**Figure 2B**). Although both  
136 populations had similar maximum and minimum instantaneous cell velocities (**Figure 2C**),  
137 eGFP-E106A<sup>hi</sup> T cells traversed longer distances compared to CMTMR controls (**Figure**  
138 **2D**), and directionality ratios, a measure of track straightness, decayed more slowly  
139 (**Figure 2E**) indicating straighter paths when Orai1 channels were blocked. Orai1-blocked  
140 cells displayed shallower turn angles than controls (**Figure 2F**). Furthermore, arrest  
141 coefficients, defined by the fraction of time that cell velocity was < 2  $\mu\text{m}/\text{min}$ , was six-fold  
142 lower for eGFP-E106A<sup>hi</sup> T cells than for control T cells (**Figure 2G**). These differences in  
143 motility suggest that the increase in average cell velocity caused by Orai1 block is not  
144 due to eGFP-E106A<sup>hi</sup> T cells moving faster than control T cells, but rather due to a  
145 reduced frequency of pausing. Consistent with this interpretation, no eGFP-E106A<sup>hi</sup> T  
146 cells with average velocities < 7  $\mu\text{m}/\text{min}$  were observed, unlike control T cells in which  
147 23% of average velocities were < 7  $\mu\text{m}/\text{min}$  (**Figure 2H**).

148 To replicate our findings in a different immunodeficient mouse model, we repeated  
149 our human T cell adoptive transfer protocol using NOD.SCID mice depleted of NK cells.  
150 Lymph nodes in these mice are small and contain reticular structures but are completely  
151 devoid of lymphocytes (Shultz, Schweitzer et al. 1995). Similar to experiments on  
152 reconstituted NOD.SCID. $\beta$ 2 mice, eGFP-E106A<sup>hi</sup> human T cells in NOD.SCID lymph  
153 nodes migrated with significantly elevated average velocities compared to control T cells  
154 (**Figure 2I**), and exhibited lower arrest coefficients (**Figure 2J**). Both eGFP-E106A<sup>hi</sup> and  
155 control T cells migrated at lower speeds in the NK-depleted NOD.SCID model compared  
156 to the reconstituted NOD.SCID. $\beta$ 2 model. Because control human T cells in reconstituted



157 NOD.SCID. $\beta$ 2 lymph nodes migrated at similar speeds to wildtype mouse T cells in vivo  
158 (Miller, Wei et al. 2002), reconstitution results in a lymph node environment that more  
159 closely mimics normal physiological conditions. Furthermore, the greater effect of Orai1  
160 block on T cell arrest coefficients in crowded reconstituted lymph nodes suggests that  
161 Orai1's role in motility is more pronounced in crowded cell environments.

162

163 **Orai1 channel activity triggers pauses during human T cell motility in vitro in the**  
164 **absence of extrinsic cell contact**

165 To evaluate whether the pronounced effect of Orai1 channel block on the arrest  
166 coefficient in reconstituted lymph nodes was a result of environmental factors such as  
167 increased cellular contacts or increased confinement, we tracked human T cells in  
168 microfabricated PDMS chambers with cell-sized microchannels 7  $\mu$ m high x 8  $\mu$ m wide.  
169 These ICAM-1 coated microchannels simulate the confined environment of densely  
170 packed lymph nodes (Jacobelli, Friedman et al. 2010), while eliminating possible cell-  
171 extrinsic factors. Transfected human T cells were activated with plate-bound anti-CD3/28  
172 antibodies and soluble IL-2, then dropped into chambers and monitored by time-lapse  
173 confocal microscopy, using phase contrast to visualize eGFP-E106A<sup>lo</sup> T cells (**Figure**  
174 **3A,B**). Upon entry into microchannels, eGFP-E106A<sup>hi</sup> T cells migrated with higher  
175 average cell velocities than eGFP-E106A<sup>lo</sup> T cells (**Figure 3C**), similar to our in vivo  
176 findings from intact lymph node (*c.f.*, **Figures 3C, 6B**). To ensure that the observed  
177 difference in cell velocity was due to suppressed Orai1 channel function and not  
178 overexpression of Orai1 protein, we also tracked T cells transfected with eGFP-tagged  
179 wildtype Orai1. Both eGFP-Orai1<sup>hi</sup> and eGFP-Orai1<sup>lo</sup> T cells migrated at the same

180 average cell velocity (**Figure 3C**), demonstrating that Orai1 channel overexpression, in  
181 itself, does not perturb T cell motility in microchannels. Since eGFP-E106A<sup>lo</sup> T cells have  
182 reduced Orai1 channel activity but still retain the same cell velocity as eGFP-Orai1  
183 transfected T cells (*c.f.*, **Figures 1A, 3C**), this suggests that partial Orai1 function is  
184 sufficient to generate normal pausing frequency in confined environments. The frequency  
185 distribution of cell velocities in vitro is comparable to our in vivo data: fewer GFP-E106A<sup>hi</sup>  
186 T cells migrated with average cell velocities < 7  $\mu\text{m}/\text{min}$  as compared to eGFP-E106A<sup>lo</sup> T  
187 cells (11% vs 29%; *c.f.*, **Figures 3D, 2G**). Furthermore, eGFP-E106A<sup>hi</sup> T cells exhibited  
188 lower arrest coefficients (**Figure 3E**) and less variation in velocity than eGFP-E106A<sup>lo</sup> T  
189 cells (**Figure 3F**). Although eGFP-E106A<sup>hi</sup> T cells had lower arrest coefficients, the  
190 durations of their pauses were not significantly different than in eGFP-E106A<sup>lo</sup> T cells  
191 (**Figure 3G**). Taken together, the reduced arrest coefficients in eGFP-E106A<sup>hi</sup> T cells  
192 indicate that inhibition of Orai1 channel activity results in reduced frequency of pauses  
193 during T cell motility. These in vitro results confirm our in vivo findings and support the  
194 hypothesis that Orai1 activity intermittently triggers cell arrest, resulting in an overall  
195 decrease in motility within confined environments. Moreover, since our in vitro  
196 microchannel assay eliminates extrinsic cell-cell interactions, this indicates that Orai1 can  
197 be spontaneously activated to modulate T cell motility.

198

### 199 **Spontaneous Ca<sup>2+</sup> signals during confined motility in vitro are correlated with** 200 **reduced T cell velocity**

201 To study the correlation between Ca<sup>2+</sup> signals and T cell motility, human CD4<sup>+</sup> T cells  
202 were transfected with Salsa6f, a novel genetically encoded Ca<sup>2+</sup> indicator consisting of

203 tdTomato fused to GCaMP6f, activated the T cells for two days with plate-bound anti-  
204 CD3/28 antibodies, then dropped into ICAM-1 coated microchambers. As previously  
205 shown (**eLIFE submission # 29-09-2017-ISRA-eLife-32417**), Salsa6f is localized to the  
206 cytosol, with red fluorescence from tdTomato that reflects fluctuations in cell movement  
207 and very low baseline green fluorescence from GCaMP6f that rises sharply during  $\text{Ca}^{2+}$   
208 signals (**Figure 4A-D**). Salsa6f-transfected human T cells were tracked in both confined  
209 microchannels (**Figure 4A, Video 1**) and the open space adjacent to entry into  
210 microchannels (**Figure 4C, Video 2**), to evaluate T cell motility under varying degrees of  
211 confinement. Intracellular  $\text{Ca}^{2+}$  levels were monitored simultaneously using the ratio of  
212 total GCaMP6f fluorescence intensity over total tdTomato fluorescence intensity  
213 (designated as G/R ratio), enabling detection of a notably stable baseline ratio unaffected  
214 by motility artifacts in moving T cells while reporting spontaneous  $\text{Ca}^{2+}$  signals that could  
215 be compared to changes in motility (**Figure 4B,D**, orange and black traces, respectively).

216 Human T cells expressing Salsa6f migrating in confined microchannels exhibited  
217 sporadic  $\text{Ca}^{2+}$  signals as brief peaks unrelated to changes in cell velocity, or as more  
218 sustained periods of  $\text{Ca}^{2+}$  elevation associated with reduced cell velocity (**Figure 5A,B**).  
219 To evaluate the correlation between T cell velocity and  $\text{Ca}^{2+}$  signals, we compared  
220 average T cell velocities during periods of sustained  $\text{Ca}^{2+}$  elevations to average velocities  
221 at baseline  $\text{Ca}^{2+}$  levels. T cell velocity decreased significantly when cytosolic  $\text{Ca}^{2+}$  was  
222 elevated above baseline ( $5.9 \pm 0.1 \mu\text{m}/\text{min}$  vs.  $10.0 \pm 0.1 \mu\text{m}/\text{min}$ ,  $p < 0.0001$ ; **Figure**  
223 **5C**).  $\text{Ca}^{2+}$  signaling episodes that last for 30 seconds or longer accompany and appear  
224 to closely track the duration of pauses in cell movement. Comparison of instantaneous  
225 velocities with corresponding cytosolic  $\text{Ca}^{2+}$  signals (G/R ratio) by scatter plot revealed a

226 strong inverse relationship: highly motile T cells always exhibited baseline  $\text{Ca}^{2+}$  levels,  
227 while elevated  $\text{Ca}^{2+}$  levels were only found in slower or arrested T cells (**Figure 5D**). It is  
228 important to note that these  $\text{Ca}^{2+}$  signals and reductions in velocity occurred in the  
229 absence of any extrinsic cell contact or antigen recognition, indicating that  $\text{Ca}^{2+}$   
230 elevations, like pausing and Orai1 activation, can be triggered in a cell-intrinsic manner.

231 To compare the effects of Orai1 activity on the motility of T cells in a less confined  
232 environment, we also monitored T cell migration within the open space in PDMS  
233 chambers adjacent to entry into microchannels (*c.f.*, **Figure 4A,C**). We reasoned that in  
234 this two-dimensional space with reduced confinement, T cells may not gain sufficient  
235 traction for rapid motility, and instead may favor integrin-dependent sliding due to  
236 increased exposure to the ICAM-1 coated surface (Krummel, Friedman et al. 2014). In  
237 addition, the same population of T cells could be tracked as they migrated into and along  
238 the confined microchannels, providing a valuable internal control. We found that eGFP-  
239 E106A<sup>hi</sup> T cells migrated with similar velocities to eGFP-E106A<sup>lo</sup> T cells in the open space,  
240 but these eGFP-E106A<sup>hi</sup> T cells still exhibited higher motility in the microchannels than  
241 eGFP-E106A<sup>lo</sup> T cells (**Figure 5E**). Furthermore, Salsa6f-transfected T cells within the  
242 open space rarely produced  $\text{Ca}^{2+}$  transients (*c.f.*, **Figure 5D,F**, top left quadrants, 13% of  
243 the time in microchannels vs 2% in open space), implying that  $\text{Ca}^{2+}$  elevations, and by  
244 extension, Orai1 channel activity, do not generate pauses when T cells are reliant on  
245 integrin binding for motility. Consistent with this, differentiated Th1 cells from CD4-Salsa6f  
246 mice also showed similar instantaneous velocities and only rare  $\text{Ca}^{2+}$  transients when  
247 plated on open-field ICAM-coated coverslips (**Figure 5-figure supplement 1**). Taken

248 together, these experiments establish a role for Orai1 channels and  $\text{Ca}^{2+}$  influx in  
249 modulating T cell motility within confined environments.

250

### 251 **Spontaneous T cell $\text{Ca}^{2+}$ transients during basal motility in the lymph node**

252 Using Salsa6f, expressed in a CD4-Cre dependent transgenic model we have reported  
253 that mouse T cells exhibit frequent transient  $\text{Ca}^{2+}$  signals (“sparkles”) in homeostatic  
254 lymph nodes in the absence of specific antigen (**eLIFE submission # 29-09-2017-ISRA-**  
255 **eLife-32417**). To further analyze the relationship between  $\text{Ca}^{2+}$  signaling and motility in  
256 detail within lymph nodes, we adoptively transferred CD4-Salsa6f<sup>+/+</sup> T cells into congenic  
257 mice and, using two-photon microscopy in explanted recipient lymph nodes, tracked the  
258 red tdTomato signal to establish cell position and the green CGaMP6f signal as a  
259 measure of cytosolic  $\text{Ca}^{2+}$ . First, to delineate any adverse effect of Salsa6f on homing  
260 and in situ motility of T lymphocytes, we co-injected equal numbers of CD4-Salsa6f<sup>+/+</sup> and  
261 CD4-Cre control cells into WT recipients (**Figure 6A**). For simultaneous imaging and to  
262 normalize any dye toxicity, CD4-Salsa6f<sup>+/+</sup> and CD4-Cre T cells were labeled with  
263 CellTrace Yellow (CTY) and CellTrace Violet (CTV), respectively. Comparable numbers  
264 of input cells were recovered from the subcutaneous lymph nodes after 18 hr (**Figure**  
265 **6B**). Two-photon imaging and tracking in lymph nodes showed typical stop and go motility  
266 and meandering cell tracks (**Figure 6C,D, Video 3**) for both cell types. Instantaneous 3D  
267 velocities (**Figure 6E**) and mean track velocities (**Figure 6F**) were indistinguishable, as  
268 was the decay rate of directionality ratio (**Figure 6H**). Furthermore, mean-squared  
269 displacement (MSD) time analysis showed random-walk behavior for both cell types with

270 similar motility coefficients (**Figure 6H, I**). Altogether, motility characteristics of Salsa6f T  
271 cells are indistinguishable from control T cells.

272 To determine whether spontaneously occurring  $\text{Ca}^{2+}$  signals are correlated with  
273 motility, we transferred CD4-Salsa6f<sup>+/+</sup> cells alone into wildtype recipients and tracked red  
274 and green fluorescence intensities in the lymph nodes after 18 hr. Consistent with our  
275 previous observation, adoptively transferred T cells retained Salsa6f indicator in their  
276 cytosol, and  $\text{Ca}^{2+}$  signals were readily observed in motile Salsa6f<sup>+</sup> T cells (**Figure 7A,**  
277 **Video 4**). We monitored the G/R ratios over time and observed a strong negative  
278 correlation between instantaneous cell velocity and  $\text{Ca}^{2+}$  levels (**Figure 7B**). By  
279 examination of fluctuating cell velocity traces with corresponding G/R ratios, we found  
280 that the  $\text{Ca}^{2+}$  rise is clearly associated with a decrease in velocity (**Figure 7C and D**).  
281 Notably, on average, peaks of  $\text{Ca}^{2+}$  transients precede the average cell velocity minimum,  
282 suggesting that spontaneous rise in intracellular  $\text{Ca}^{2+}$  levels leads to cell pausing (**Figure**  
283 **7E**).

284

285 **Frequency, duration and MHC dependence of T cell  $\text{Ca}^{2+}$  transients in homeostatic**  
286 **lymph nodes.**

287 Imaging adoptively transferred T cells in recipient lymph nodes is an ideal approach to  
288 probe in vivo T-cell motility. However, this approach is limiting when it comes to identifying  
289 the abundance and duration of  $\text{Ca}^{2+}$  signaling events, because transferred cells label only  
290 a fraction of the lymph node (< 1%) and longer imaging intervals are required to collect  
291 sufficient volume of 4D data (> 5 second). Therefore, to measure the endogenous  
292 frequency and duration  $\text{Ca}^{2+}$  transients, we imaged homeostatic CD4-Salsa6f<sup>+/+</sup> lymph

293 nodes at 2 frames per second. All endogenous T cells (CD4<sup>+</sup> and CD8<sup>+</sup>) are labeled with  
294 the Salsa6f probe in CD4-Salsa6f<sup>+/+</sup> lymph nodes because T cells go through the double-  
295 positive stage during development in the thymus. More than 800 Ca<sup>2+</sup> transients were  
296 identified in a 300 x 300 μm area in a 10-minute interval. We identified two types of Ca<sup>2+</sup>  
297 transients: numerous small and brief spots (sparkles); and less frequent large, cell-wide  
298 transients (**Figure 8A, Video 5**). Consistent with our previous report (**eLIFE submission**  
299 **29-09-2017-ISRA-eLife-32417**), most Ca<sup>2+</sup> transients were localized to small regions of  
300 the cell and of short duration, spanning 2 μm<sup>2</sup> in area (**Figure 8B**) and lasting about 2 sec  
301 (**Figure 8C**). Altogether, the strong association of Ca<sup>2+</sup> transients with reductions in cell  
302 velocity leading to pausing, and the sheer number of Ca<sup>2+</sup> transients in homeostatic lymph  
303 nodes suggest that cytosolic Ca<sup>2+</sup> is a key regulator of basal cellular motility under steady-  
304 state conditions in the absence of specific antigen.

305 Lymphocytes migrate in the immune dense micro-environment of secondary  
306 lymphoid tissues, constantly interacting with other immune cells, including resident  
307 antigen presenting cells (Germain, Robey et al. 2012). Indeed, constant recognition of  
308 low levels of self-antigens through T cells receptor (TCR)-pMHC interactions is critical for  
309 maintaining sensitivity to foreign antigens (Stefanova, Dorfman et al. 2002); and  
310 deprivation (>7 days) of pMHC-II signals impairs T cell motility (Fischer, Jacovetty et al.  
311 2007). To investigate whether Ca<sup>2+</sup> signals in steady state lymph nodes are result of self-  
312 peptide recognition, we blocked MHC Class I and II signaling for 48 hr in CD4-Salsa6f<sup>+/+</sup>  
313 lymph nodes. The number of cell-wide events was not significantly different (p = 0.06),  
314 whereas the sparkle frequency was significantly decreased (p = 0.02) in MHC-blocked  
315 lymph nodes compared to isotype control (ITC) antibody treatment (**Figure 9A, D-G**).

316 There was also significant variation in the number of  $\text{Ca}^{2+}$  transients in ITC antibody and  
317 uninjected controls (Coefficient of variation = 41 to 45%), which may be due to the  
318 presence of heterogeneous antigen presenting cells displaying varying amount of self-  
319 peptides during steady-state. Most notably however, a significant number of  $\text{Ca}^{2+}$   
320 transients remained even after MHC block, which we believe reflects a basal level of  
321 spontaneous  $\text{Ca}^{2+}$  activity independent of antigen recognition. In contrast, the intensity of  
322 individual  $\text{Ca}^{2+}$  transients in MHC blocked lymph nodes did not differ significantly from the  
323 ITC controls (**Figure 9B,C**). Altogether, our data indicate that T cells display substantial  
324 spontaneous  $\text{Ca}^{2+}$  transients even in absence of self-peptide recognition, suggesting a  
325 role in regulating basal T lymphocyte motility.



## 326 **Discussion**

327 In this study, we demonstrate that Orai1 channel activity regulates motility patterns that  
328 underlie immune surveillance. Human T cells expressing the dominant-negative Orai1-  
329 E106A construct migrated with higher average velocities than controls, both in  
330 reconstituted mouse lymph nodes *in vivo* and in confined microchannels *in vitro*. In  
331 particular, we found that the increase in average cell velocity was not due to an increase  
332 in maximum cell velocity, but to a reduced frequency of cell pausing accompanied by  
333 increased directional persistence, resulting in straighter paths. Human T cells  
334 demonstrate  $\text{Ca}^{2+}$  transient-associated and Orai1-dependent pauses *in vitro* within  
335 confined microchannels devoid of cell-extrinsic factors. Furthermore, we use a novel  
336 ratiometric genetically encoded  $\text{Ca}^{2+}$  indicator, Salsa6f, along with T cells from CD4-  
337 Salsa6f<sup>f/+</sup> transgenic mice, to show that intermittent  $\text{Ca}^{2+}$  signals coincide with reduced  
338 cell velocity. Treatment of CD4-Salsa6f<sup>f/+</sup> mice with MHC class-I and -II blocking  
339 antibodies substantially reduces but does not eliminate the frequent T cell  $\text{Ca}^{2+}$  transients  
340 seen in lymph nodes. Based on these findings, we propose that Orai1 channel activity  
341 regulates the timing of stop-and-go motility in T cells and tunes the search for cognate  
342 antigen in the crowded lymph node.

343 Our Orai1-E106A construct derives its specificity and potency by targeting the pore  
344 residue responsible for the channel selectivity filter. Incorporation of Orai1-E106A likely  
345 blocks heterodimers of Orai1 and other channels, such as Orai2 or Orai3, in addition to  
346 homomeric Orai1 channels. Very recent evidence demonstrates the existence of  
347 heteromeric channels composed of Orai1 and Orai2 in T cells (Vaeth, Yang et al. 2017).  
348 These heteromers appear to simply reduce the flow of  $\text{Ca}^{2+}$  through the Orai1 channel

349 without targeting additional signaling pathways. In the absence of contradictory evidence,  
350 we conclude that in T cells Orai1-E106A acts to produce an essentially complete  
351 functional knockdown of Orai1-mediated store-operated  $\text{Ca}^{2+}$  entry.

352 Human T cells exhibit systematic changes in motility behavior after Orai1 block,  
353 including: increased average velocity, fewer pauses, increased directional persistence  
354 and decreased turn angles, and increased motility spread over time. Importantly,  
355 maximum and minimum instantaneous velocities are unchanged. For human T cells  
356 assessed in motility assays in vitro, similar Orai1 dependent changes are seen. Altered  
357 pausing behavior caused by Orai1 block is displayed by isolated single cells inside  
358 microchannels formed from photolithographically precise silicon master molds. Changes  
359 in motility are dependent upon confinement, as Orai1 block alters pausing under confined  
360 but not open-field conditions. The absence of changes to maximum and minimum  
361 velocities in vivo and open field motility in vitro indicates that Orai1 block is not generally  
362 deleterious for cell health and movement, but instead acts upon subcellular mechanisms  
363 that are selectively employed during cell motility in confined spaces. Taken together,  
364 these systematic changes caused by Orai1 block reveal the presence of an Orai1-  
365 dependent cell motility program that is utilized frequently enough to be easily detected by  
366 changes in the motility characteristics of T cells in the lymph node.

367 We used CD4-Salsa6f<sup>+/+</sup> mice to track CD4<sup>+</sup> T cell  $\text{Ca}^{2+}$  signals in intact mouse  
368 lymph nodes and Salsa6f transient transfection to track  $\text{Ca}^{2+}$  signals in human T cells in  
369 vitro and in reconstituted mouse lymph nodes. In our companion paper, **eLIFE**  
370 **submission # 29-09-2017-ISRA-eLife-32417**, we show that Salsa6f expression in CD4<sup>+</sup>  
371 T cells is non-perturbing with respect to lymphocyte development, cellular phenotype, cell

372 proliferation, and differentiation. Here we demonstrate that homing to lymph nodes is  
373 unaffected, as are movement patterns within the lymph node, cell velocity, directional  
374 persistence, diffusive spread, and motility coefficient. We find that across cells, elevated  
375  $\text{Ca}^{2+}$  levels are inversely correlated with instantaneous velocity, both in vitro and in vivo.  
376 In vivo, moving cells exhibit local  $\text{Ca}^{2+}$  signals that are strongly associated with pauses in  
377 motility. By inspection of movement patterns, turning is likely associated with  $\text{Ca}^{2+}$   
378 signaling events as well, but this has not been established because most cells move  
379 outside of our shallow imaging field either before or after pausing. In many contexts,  $\text{Ca}^{2+}$   
380 signaling has been shown not only to accompany, but also to cause cell arrest and loss  
381 of cell polarity, such as in T cells after activation by antigen (Negulescu, Krasieva et al.  
382 1996, Dustin, Bromley et al. 1997, Wei, Safrina et al. 2007). By averaging events, the  
383 peak of subcellular  $\text{Ca}^{2+}$  transients was found to precede the velocity minimum. This event  
384 order is consistent with  $\text{Ca}^{2+}$  causing pauses. While we do not show that the  $\text{Ca}^{2+}$  signals  
385 we observe emanate directly from Orai1 channels, taken together our data are consistent  
386 with Orai1 actively regulating cell motility by directly inducing a subcellular motility  
387 program that leads to cell arrest.

388 Two-photon imaging indicated that the frequency of  $\text{CD4}^{+}$  T cells  $\text{Ca}^{2+}$  transients  
389 varies widely between Salsaf lymph nodes, even when events are normalized for  
390 different cell numbers. The origin of this variability is unclear, but may result from  
391 differences in the distribution and functional properties of APCs within the imaging field.  
392 Treatment of MHC class-I and -II blocking antibodies substantially reduces but does not  
393 eliminate T cells  $\text{Ca}^{2+}$  transients. Clearly, a significant number of  $\text{Ca}^{2+}$  transients are  
394 caused by T cell-APC interactions that act through MHC proteins. Given that Orai1 motility

395 events occur frequently as T cell migrate through the lymph node, and  $\text{Ca}^{2+}$  transients  
396 are associated with pauses in motility, we propose that spontaneously generated Orai1-  
397 dependent pauses and turns can be triggered by T cell-APC interaction through MHC  
398 proteins.

399         However, we find evidence for MHC-independent triggering of  $\text{Ca}^{2+}$  signaling and  
400 Orai1 channel activation in the lymph node. Human T cells exhibit Orai1-dependent  
401 pauses in vitro when migrating as isolated cells in highly uniform microchannels. Salsa6f  
402 expression independently detects  $\text{Ca}^{2+}$  transients in isolated T cells moving within  
403 microchannels but not in T cells in adjacent open field portions of the same PDMS imaging  
404 chamber. In both cases responses were produced in the absence of MHC proteins or  
405 APCs. Moreover, we note that, in paired experiments, treatment with MHC class-I and –  
406 II blocking antibodies leads to a reduced but notably consistent frequency of  $\text{Ca}^{2+}$   
407 signaling events. Partial block would be expected to produce substantial variation,  
408 especially when combined with a variable input population. Taken together, these data  
409 point to the existence of not only MHC-independent Orai1 motility events, but also cell-  
410 intrinsic triggering of Orai1. Of note, the apparently random nature of naïve T cell  
411 movement in the lymph node has led to the hypothesis that T cells use intrinsic and  
412 stochastic motility mechanisms to accomplish immune surveillance (Wei, Parker et al.  
413 2003, Mrass, Petravac et al. 2010, Germain, Robey et al. 2012).

414         In previous studies of Orai1 signaling, Orai1 activation has been placed  
415 downstream of extracellular ligand binding to cell surface receptors, integrating their input  
416 upon use-dependent depletion of  $\text{Ca}^{2+}$  from the ER (Feske 2007, Cahalan and Chandy  
417 2009). While we expect signaling downstream of self-antigen detection to be the same as

418 for cognate antigens (Stefanova, Dorfman et al. 2002), at this point it is unclear which  
419 aspects of internal cell state might lead to cell-intrinsic opening of Orai1 channels and  
420 pauses in motility. Of particular interest is determining the step in the signaling cascade  
421 from phospholipase C to Orai1 that might be targeted by a novel cell-intrinsic activation  
422 pathway. Molecular candidates that underlie regulation of T cell motility by  $Ca^{2+}$  are less  
423 well defined. One clue to Orai1 action is the subcellular location of  $Ca^{2+}$  transients at the  
424 back T cells moving within intact lymph nodes, similar to the localization of Orai1 channels  
425 during movement in vitro (Barr, Bernot et al. 2008). Early studies demonstrated that  
426 immobilization and rounding of T cells bound to antigen presenting B cells occurred via a  
427 calcineurin-independent pathway (Negulescu, Krasieva et al. 1996).  $Ca^{2+}$  sensitive  
428 cytoskeletal proteins, such as myosin II or the actin bundling protein L-plastin, as good  
429 candidates for downstream effectors (Babich and Burkhardt 2013, Morley 2013). Like  
430 Orai1, Myosin 1g is selectively required for motility mechanisms under confined  
431 conditions (Gerard, Patino-Lopez et al. 2014). While Orai1 block reduces pausing but  
432 does not otherwise alter T cell velocity, Myo1g block increases pausing and causes cells  
433 to move faster. These differences in phenotype suggest that Orai1 and Myo1g act in  
434 different, and in part opposing, ways to control T cell motility.

435 Immune surveillance requires balancing many factors associated with antigen  
436 search, including speed and sensitivity (Friedl and Weigelin 2008, Krummel, Bartumeus  
437 et al. 2016). As moving T cells in the lymph node encounter APCs bearing antigen-MHC,  
438 they pause due to  $Ca^{2+}$  dependent mechanisms unleashed by Orai1 channel opening.  
439 These pauses likely ensure adequate time for TCR-antigen scanning by T cell-APC pairs.  
440 Our observations of T cell motility indicates that each T cell does not stop at every APC

441 it encounters. Because of this movement pattern, Orai1 provides attractive point of  
442 regulation of immune surveillance. Increasing Orai1 activity might be expected to cause  
443 T cells to pause more frequently when encountering APCs, restricting the distance T cells  
444 move and offering increased opportunities for contact with nearby APCs. Alternatively,  
445 decreasing Orai1 activity leads to fewer pauses, greater directional persistence, fewer  
446 turns, and greater overall diffusive spread. In this way Orai1 channel activity could tailor  
447 T cell excursions to match the density and reach of dendritic cells in the lymph node.  
448 Finally, our findings provide further evidence that during resting conditions, TCR  
449 interactions with self-MHC antigens drive continual but limited activation of downstream  
450 signaling pathways.

451 We note some differences between our study and others involving Orai1, STIM1,  
452 and T cell motility. These differences might be accounted for, in part, by the expected  
453 consequences of our Orai1 dominant-negative approach: block of all three Orai isoforms,  
454 limited time for compensatory changes in cell function, and restriction of Orai block to T  
455 cells that are adoptively transferred after transfection. (1) Orai1/2 and STIM1/2 KO mice have  
456 been reported to home to lymph node like wild type, unlike our results here and in a  
457 previous paper (Greenberg, Yu et al. 2013, Waite, Vardhana et al. 2013, Vaeth, Yang et  
458 al. 2017). (2) Maximal T cell velocity in the lymph node requires the action of the integrin  
459 LFA-1 and the chemokine receptor CCR7 (Davalos-Misslitz, Worbs et al. 2007, Katakai,  
460 Habiro et al. 2013), which we have previously shown to be required for entry of T cells  
461 into lymph nodes and to act in an Orai1-dependent manner (Greenberg, Yu et al. 2013).  
462 Based upon these findings, blocking Orai1 would be expected to reduce CCR7 and LFA-  
463 1 function during interstitial motility as well, resulting in a decrease in T cell velocity.

464 Instead, we find the opposite: Orai1 block leads to an increase in average cell velocity.  
465 The absence of any Orai1-dependent change in maximum velocity strongly suggests that  
466 CCR7 and LFA-1 do not act through Orai1 during motility in the lymph node. Regardless,  
467 any motility effects of LFA-1 and CCR7 are more than compensated by the reduction in  
468 pauses caused by Orai1 E106A expression. (3) Previous studies using unconfined open  
469 field motility assays have excluded a role for Orai1 in T cell motility (Svensson, McDowall  
470 et al. 2010, Kuras, Yun et al. 2012). Our experiments confirm that Orai1 block does not  
471 detectably affect unconfined motility; in contrast, our studies in reconstituted lymph nodes  
472 and in confined microchannels in vitro both exhibit Orai1-dependent effects. Others have  
473 shown that confined motility in vitro better recapitulates mechanisms of motility found in  
474 T cells in intact lymph nodes (Jacobelli, Friedman et al. 2010, Krummel, Bartumeus et al.  
475 2016).

476 In conclusion, we reveal the existence of an Orai1-dependent cell motility program that  
477 leads to pausing of T cells moving within lymph nodes. Imaging with the newly  
478 developed genetically encoded  $Ca^{2+}$  indicator Salsa6f identifies local transient  $Ca^{2+}$   
479 signaling events with the expected characteristics of Orai1  $Ca^{2+}$  signals. We provide  
480 evidence that Orai1-dependent pauses in T cells are triggered in at least two  
481 different ways: by self-peptide MHC complexes displayed on the surface of APCs and  
482 by a novel cell intrinsic mechanism within the T cells themselves. Together these  
483 mechanisms generate motility patterns that promote efficient scanning for cognate  
484 antigens in the lymph node.

485 **Acknowledgments**

486 We thank Angel Zavala and Drs. Lurette Forrest and Olga Safrina for expert assistance,  
487 excellent animal care and vivarium support, and Dr. Audrey Gerard, the Matthew  
488 Krummel Lab at UCSF, and the Christopher Hughes Lab at UCI for assistance in  
489 establishing the microchamber fabrication technique. We acknowledge the UC Irvine  
490 Institute for Clinical and Translational Science, and Dr. Jennifer Atwood of the Flow Core  
491 Facility supported by the UC Irvine Institute of Immunology.

492



493 **Methods**

494 **Mice and antibodies**

495 NOD.Cg-*Prkdc*<sup>scid</sup>*B2m*<sup>tm1Unc</sup>/J (NOD.SCID.β2) and NOD.CB17-*Prkdc*<sup>scid</sup>/J (NOD.SCID)  
496 mice obtained from Jackson Laboratory (Stock #002570 and #001303) were housed and  
497 monitored in a selective pathogen-free environment with sterile food and water in the  
498 animal housing facility at the University of California, Irvine. NOD.SCID.β2 mice were  
499 reconstituted with human peripheral blood leukocytes (PBLs) as described previously  
500 (Mosier, Gulizia et al. 1988). A total of  $3 \times 10^7$  human PBLs were injected i.p., and  
501 experiments were performed three weeks later. To inhibit NK cell activity, NOD.SCID  
502 mice were i.p. injected with 20 μL anti-NK cell antibody (rabbit anti-Asialo GM1, Wako  
503 Chemicals, Irvine, CA) according to manufacturer's instructions 3-4 days before adoptive  
504 transfer of human T cells. Mice used were between 8 and 18 weeks of age. The  
505 Salsa6f<sup>fLSL/LSL</sup> (tdTomato-V5-GCaMP6f) mouse strain was generated in the C57BL/6N  
506 background, as described in the accompanying manuscript, and subsequently crossed to  
507 homozygotic CD4-Cre mice (JAX #017336) to generate CD4Cre<sup>+/-</sup> Salsa6f<sup>+/-</sup> mice  
508 (designated as CD4-Salsa6f<sup>+/-</sup> mice) expressing Salsa6f only in T cells. CD4Cre<sup>+/-</sup>  
509 Salsa6f<sup>+/-</sup> mice were further bred to generate homozygotic CD4Cre<sup>+/-</sup> Salsa6f<sup>+/+</sup> mice  
510 (CD4-Salsa6f<sup>+/+</sup> mice) for increased Salsa6f expression and fluorescence. Age- and sex-  
511 matched C57BL/6J mice from Jackson Laboratory (stock #000664) were used as wildtype  
512 recipients of CD4-Salsa6f<sup>+/+</sup> T cells. To block TCR-MHC interactions, 2 mg of anti-MHC II  
513 (Clone Y3P) and 2 mg of anti-MHC I (Clone AF6-88.5.5.3) or 4 mg of IgG2a Isotype  
514 control (Clone: C1.18.4) antibodies (Bio X cell) were injected into CD4-Salsa6f<sup>+/+</sup> litter  
515 mates (i.p) 48 hr before imaging.

516

### 517 **Human T cell preparation for imaging**

518 Human PBMCs were isolated from blood of voluntary healthy donors by Histopaque-1077  
519 (1.077 g/mL; Sigma, St. Louis, MO) density gradient centrifugation, and human T cells  
520 isolated using the appropriate EasySep T Cell Isolation Kit (StemCell Technologies).  
521 Purified human T cells were rested overnight in complete RPMI, then transfected by  
522 nucleofection (Lonza, Walkersville, MD), using the high-viability “U-014” protocol.  
523 Enhanced green fluorescent protein (eGFP)-tagged wildtype Orai1, eGFP-tagged Orai1-  
524 E106A mutant, Salsa6f (tdTomato-V5-GCaMP6f construct), or empty vector control were  
525 transfected as indicated. Human T cells were used for experiments 3-48 hr after  
526 transfection. CMTMR control T cells were prepared by labelling with 10  $\mu$ M CellTracker  
527 CMTMR dye (Invitrogen, Carlsbad, CA) for 10 min at 37 °C. For in vivo imaging 10 million  
528 human T cells were injected into NOD.SCID. $\beta$ 2 or NOD.SCID mice as indicated. For in  
529 vitro imaging experiments, T cells were rested for 3-4 hr in complete RPMI, then washed  
530 and activated on plate-bound  $\alpha$ CD3 and  $\alpha$ CD28 (Tonbo Biosciences, San Diego, CA) in  
531 2.5 ng/mL recombinant human IL-2 (BioLegend, San Diego, CA), and imaged 24-48 hr  
532 after transfection.

533

### 534 **Mouse T cell preparation for imaging**

535 Single cell suspensions of mouse lymphocytes were prepared by mechanical dissociation  
536 of spleen and lymph nodes and passing through 70  $\mu$ m filter. CD4<sup>+</sup> T cells were isolated  
537 using the EasySep T Cell Isolation Kit (StemCell Technologies) according to  
538 manufacturer's instructions. The purity of isolated cells was confirmed to be >95% by flow

539 cytometry. To compare motility characteristics, CD4-Salsa6f<sup>+/+</sup> and CD4-Cre control cells  
540 were labeled with 10  $\mu$ M CellTrace Yellow or CellTrace Violet, respectively, for 20 min at  
541 37<sup>0</sup> C. To measure Ca<sup>2+</sup> during T cell motility, unlabeled CD4-Salsa6f<sup>+/+</sup> T cells were  
542 adoptively transferred into wildtype recipients. A total of 3-10 million T cells were injected  
543 into recipient mice in adoptive transfer experiments (*i.v.*: tail-vein or retro-orbital). For  
544 confocal imaging on open-field ICAM-1 coated coverslips, CD4<sup>+</sup> T cells from CD4-  
545 Salsa6f<sup>+/-</sup> mice were differentiated into Th1 cells using 25 ng/mL rIL-12 (BioLegend),  
546 10  $\mu$ g/mL mouse IL4 (Biolegend) for 4-6 days.

547

#### 548 **Microchannel fabrication and imaging**

549 Microchannel fluidic devices were fabricated by a soft lithography technique with PDMS  
550 (polydimethylsiloxane; Sylgard Elastomer 184 kit; Dow Corning, Auburn, MI) as described  
551 (Jacobelli, Friedman et al. 2010, Gerard, Patino-Lopez et al. 2014). PDMS base and  
552 curing agent were mixed 10:1 and poured onto the silicon master, then left overnight in  
553 vacuum. Once the PDMS was set, it was baked at 55 °C for 1 hr and cooled at room  
554 temperature. The embedded microchambers were then cut from the mold, and a cell well  
555 was punched adjacent to entry into the channels. The PDMS cast and a chambered  
556 coverglass (Nunc Lab-Tek, ThermoFisher, Grand Island, NY) were activated for two  
557 minutes in a plasma cleaner (Harrick Plasma, Ithaca, NY), bonded together, then  
558 incubated at 55 °C for 10 min. Prepared chambers were stored for up to 1 month before  
559 use. Prior to imaging, microchambers placed in the plasma cleaner for 5 min under  
560 vacuum and 1 min of activation, then coated with 5  $\mu$ g/mL recombinant human ICAM-  
561 1/CD54 Fc (R&D Systems, Minneapolis, MN) in PBS for at least 1 hr at 37 °C. The

562 microchambers were then washed three times with PBS, and T cells were loaded into cell  
563 wells ( $3\text{-}5 \times 10^5$  cells resuspended in 10  $\mu\text{L}$ ) and incubated at 37 °C for at least 1 hr before  
564 imaging.

565

### 566 **Confocal imaging and analysis**

567 Two different Olympus confocal microscopy systems were used to image T cells in vitro.  
568 For experiments tracking T cell motility in microchambers, we used the self-contained  
569 Olympus Fluoview FV10i-LIV, with a 473 nm diode laser for excitation and a 60x phase  
570 contrast water immersion objective (NA 1.2). The FV10i-LIV contains a built-in incubator  
571 set to 37 °C, together with a Tokai-Hit stagetop incubator to maintain local temperature  
572 and humidity. T cells were imaged in RPMI adjusted to 2 mM  $\text{Ca}^{2+}$  and 2% FCS, and  
573 mounted at least half an hour before imaging to allow for equilibration. Cells were imaged  
574 at 20-sec intervals for 20-30 min, and the data analyzed using Imaris software. For  $\text{Ca}^{2+}$   
575 imaging of Salsa6f transfected T cells, we used a Fluoview FV3000RS confocal laser  
576 scanning microscope, equipped with high speed resonance scanner and the IX3-ZDC2  
577 Z-drift compensator. Diode lasers (488 and 561 nm) were used for excitation, and two  
578 high sensitivity cooled GaAsP PMTs were used for detection of GCaMP6f and tdTomato.  
579 Cells were imaged using the Olympus 40x silicone oil objective (NA 1.25), by taking 4  
580 slice z-stacks at 1.5  $\mu\text{m}/\text{step}$ , at 3 sec intervals, for up to 20 min. Temperature, humidity,  
581 and  $\text{CO}_2$  were maintained using a Tokai-Hit WSKM-F1 stagetop incubator. Data were  
582 processed and analyzed using Imaris software.

583

### 584 **Two-photon imaging and analysis**

585 Multi-dimensional (x, y, z, time, emission wavelength) two-photon microscopy was  
586 employed to image fluorescently labeled lymphocytes in explanted mouse lymph nodes,  
587 as described (Miller, Wei et al. 2002, Matheu, Othy et al. 2015). The following  
588 wavelengths were used to excite single or combinations of fluorophores: 900 nm to excite  
589 eGFP and CMTMR; 800 nm to excite cell trace violet (Thermofisher C34557) and cell  
590 trace yellow (Thermofisher, C34567); 920 nm to excite tdTomato and GCaMP6f;  
591 Fluorescence emission was split by 484 nm & 538 nm dichroic mirrors into three detector  
592 channels, used to visualize CellTrace Violet or second harmonic signal generated from  
593 collagen in blue; GCaMP6f or eGFP-Orai1E106A transfected cells in green; tdTomato or  
594 CellTrace Yellow or CMTMR-labelled cells in red. For imaging, lymph nodes were  
595 oriented with the hilum away from the water dipping microscope objective (Olympus 20x,  
596 NA 0.9 or Nikon 25x, NA 1.05) on an upright microscope (Olympus BX51). The node was  
597 maintained at 36-37 °C by perfusion with medium (RPMI) bubbled with carbogen (95%  
598 O<sub>2</sub> / 5% CO<sub>2</sub>). For imaging of human T cells 3D image stacks of x=200 μm, y=162 μm,  
599 and z=50 μm were sequentially acquired at 18-20 second intervals using MetaMorph  
600 software (Molecular Devices, Sunnyvale, CA). For tracking adoptively transferred mouse  
601 T cells, 3D image stacks of x=250 μm, y=250 μm, and z=20 or 52 μm (Voxel size 0.48  
602 μm x 0.48 μm x 4 μm) were sequentially acquired at 5 or 12 second intervals respectively,  
603 using image acquisition software Slidebook (Intelligent Imaging Innovations) as described  
604 previously (Matheu, Othy et al. 2015). This volume collection was repeated for up to 40  
605 min to create a 4D data set. For fast imaging of CD4-Salsa6f<sup>+/+</sup> lymph nodes, we acquired  
606 2DT images of 300 μm x 300 μm (pixel size 0.65 x 0.65 μm) every 0.5 seconds. For  
607 comparing Ca<sup>2+</sup> transients in MHC blocking experiments, 3D image stacks of x=350 μm,

608 y=350  $\mu\text{m}$ , and z=20  $\mu\text{m}$  (Voxel size 0.65  $\mu\text{m}$  x 0.65  $\mu\text{m}$  x 4  $\mu\text{m}$ ) were sequentially  
609 acquired at 5 second intervals. Cell motility data were processed and analyzed using  
610 Imaris software (Bitplane USA, Concord, MA). A combination of manual and automatic  
611 tracking was used to generate highly accurate cell tracks. The x,y,z coordinates of the  
612 tracks were used to calculate speed, M.S.D, directionality ratio, motility coefficients, and  
613 to plot tracks as described previously (Gorelik and Gautreau 2014, Matheu, Othy et al.  
614 2015). Calcium transient (sparkles and cell-wide) analysis and estimation of duration was  
615 performed as described previously (**eLIFE submission # 29-09-2017-ISRA-eLife-**  
616 **32417**). XYT data was processed to mask autofluorescent structures, and time was  
617 mapped on the Z axis for the purpose of  $\text{Ca}^{2+}$  transient identification.  $\text{Ca}^{2+}$  transients were  
618 identified in Imaris by a surface-based object identification approach, after manual  
619 thresholding of intensity, voxel size (>10) and 2-sec minimum duration. Objects were  
620 modeled as ellipsoids; X and Y diameter measurements of surfaces were used to  
621 calculate areas, and Z diameter (time) was used to estimate duration of  $\text{Ca}^{2+}$  transients.  
622 For MHC-block experiments to estimate the number and intensities of  $\text{Ca}^{2+}$  transients we  
623 utilized maximum intensity projections from 6 Z stacks. Integrated intensities were  
624 normalized to standard deviations of the green channel for comparison of brightness of  
625  $\text{Ca}^{2+}$  transients.

626

### 627 **Data analysis and statistical testing**

628 Samples sizes were comparable to previous single cell analyses of motility (Jacobelli,  
629 Friedman et al. 2010, Greenberg, Yu et al. 2013, Gerard, Patino-Lopez et al. 2014). Each  
630 experiment used separate isolations of human T cells from different donors. With the

631 exception of instantaneous velocities in Figure 6C, each measurement corresponds to a  
632 different cell. Mean  $\pm$  standard error of the mean was used as a measure of the central  
633 tendency of distributions. Video analysis was performed using Imaris software, Spots  
634 analysis was used for tracking of cell velocity and Volumes analysis was used for  
635 measuring total fluorescence intensity of GECl probes. To reduce selection bias in our  
636 analysis of motility and trajectory, all clearly visible and live cells were tracked from each  
637 video segment. The arrest coefficient is defined as fraction of time each cell had an  
638 instantaneous velocity  $< 2 \mu\text{m}/\text{min}$ . The coefficient of variation was defined for each  
639 individual cell as the standard deviation divided by the mean of its instantaneous velocity.  
640 For Salsa6f imaging analysis, ratio (R) was calculated by total GCaMP6f intensity divided  
641 by total tdTomato intensity, while initial ratio ( $R_0$ ) was calculated by averaging the ratios  
642 of the first five time points in each individual cell trace. Photobleaching of tdTomato  
643 fluorescence intensity (20-30% decline) was corrected in ratio calculations, as a linear  
644 function of time. Figures were generated using Prism 6 (GraphPad Software, San Diego,  
645 CA) and Origin 5 (OriginLabs, Northampton, MA). Due to the expectation that individual  
646 cells exhibit multiple motility modes, and to avoid assumptions concerning the shapes of  
647 motility distributions, non-parametric statistical testing was performed (Mann-Whitney  $U$   
648 test, unpaired samples, two-tailed, Spearman's rank correlation). Differences with a  $p$   
649 value of  $\leq 0.05$  were considered significant:  $*p \leq 0.05$ ;  $**p < 0.01$ ;  $***p < 0.005$ ;  $****p <$   
650  $0.001$ . Similar distributions were compared using the Hodges-Lehmann median  
651 difference value and 95% confidence intervals under the assumption that the starting  
652 distributions had similar shapes.  
653

654 **References**

- 655 Babich, A. and J. K. Burkhardt (2013). "Coordinate control of cytoskeletal remodeling and  
656 calcium mobilization during T-cell activation." Immunol Rev **256**(1): 80-94.
- 657 Bajenoff, M., J. G. Egen, L. Y. Koo, J. P. Laugier, F. Brau, N. Glaichenhaus and R. N. Germain  
658 (2006). "Stromal cell networks regulate lymphocyte entry, migration, and territoriality in  
659 lymph nodes." Immunity **25**(6): 989-1001.
- 660 Barr, V. A., K. M. Bernot, S. Srikanth, Y. Gwack, L. Balagopalan, C. K. Regan, D. J. Helman, C.  
661 L. Sommers, M. Oh-Hora, A. Rao and L. E. Samelson (2008). "Dynamic movement of  
662 the calcium sensor STIM1 and the calcium channel Orai1 in activated T-cells: puncta  
663 and distal caps." Mol Biol Cell **19**(7): 2802-2817.
- 664 Bhakta, N. R., D. Y. Oh and R. S. Lewis (2005). "Calcium oscillations regulate thymocyte  
665 motility during positive selection in the three-dimensional thymic environment." Nat  
666 Immunol **6**(2): 143-151.
- 667 Bousso, P. and E. Robey (2003). "Dynamics of CD8+ T cell priming by dendritic cells in intact  
668 lymph nodes." Nat Immunol **4**(6): 579-585.
- 669 Cahalan, M. D. and K. G. Chandy (2009). "The functional network of ion channels in T  
670 lymphocytes." Immunol Rev **231**(1): 59-87.
- 671 Cahalan, M. D. and I. Parker (2005). "Close encounters of the first and second kind: T-DC and  
672 T-B interactions in the lymph node." Semin Immunol **17**(6): 442-451.
- 673 Calloway, N., M. Vig, J. P. Kinet, D. Holowka and B. Baird (2009). "Molecular clustering of  
674 STIM1 with Orai1/CRACM1 at the plasma membrane depends dynamically on depletion  
675 of Ca<sup>2+</sup> stores and on electrostatic interactions." Mol Biol Cell **20**(1): 389-399.
- 676 Davalos-Misslitz, A. C., T. Worbs, S. Willenzon, G. Bernhardt and R. Forster (2007). "Impaired  
677 responsiveness to T-cell receptor stimulation and defective negative selection of  
678 thymocytes in CCR7-deficient mice." Blood **110**(13): 4351-4359.
- 679 Dixit, N., I. Yamayoshi, A. Nazarian and S. I. Simon (2011). "Migrational guidance of neutrophils  
680 is mechanotransduced via high-affinity LFA-1 and calcium flux." J Immunol **187**(1): 472-  
681 481.
- 682 Donnadieu, E., G. Bismuth and A. Trautmann (1994). "Antigen recognition by helper T cells  
683 elicits a sequence of distinct changes of their shape and intracellular calcium." Curr Biol  
684 **4**(7): 584-595.



- 685 Dustin, M. L., S. K. Bromley, Z. Kan, D. A. Peterson and E. R. Unanue (1997). "Antigen receptor  
686 engagement delivers a stop signal to migrating T lymphocytes." Proc Natl Acad Sci U S  
687 A **94**(8): 3909-3913.
- 688 Feske, S. (2007). "Calcium signalling in lymphocyte activation and disease." Nat Rev Immunol  
689 **7**(9): 690-702.
- 690 Feske, S., Y. Gwack, M. Prakriya, S. Srikanth, S. H. Puppel, B. Tanasa, P. G. Hogan, R. S.  
691 Lewis, M. Daly and A. Rao (2006). "A mutation in Orai1 causes immune deficiency by  
692 abrogating CRAC channel function." Nature **441**(7090): 179-185.
- 693 Fischer, U. B., E. L. Jacovetty, R. B. Medeiros, B. D. Goudy, T. Zell, J. B. Swanson, E. Lorenz,  
694 Y. Shimizu, M. J. Miller, A. Khoruts and E. Ingulli (2007). "MHC class II deprivation  
695 impairs CD4 T cell motility and responsiveness to antigen-bearing dendritic cells in vivo."  
696 Proc Natl Acad Sci U S A **104**(17): 7181-7186.
- 697 Friedl, P. and B. Weigelin (2008). "Interstitial leukocyte migration and immune function." Nat  
698 Immunol **9**(9): 960-969.
- 699 Gerard, A., G. Patino-Lopez, P. Beemiller, R. Nambiar, K. Ben-Aissa, Y. Liu, F. J. Totah, M. J.  
700 Tyska, S. Shaw and M. F. Krummel (2014). "Detection of rare antigen-presenting cells  
701 through T cell-intrinsic meandering motility, mediated by Myo1g." Cell **158**(3): 492-505.
- 702 Germain, R. N., E. A. Robey and M. D. Cahalan (2012). "A decade of imaging cellular motility  
703 and interaction dynamics in the immune system." Science **336**(6089): 1676-1681.
- 704 Gorelik, R. and A. Gautreau (2014). "Quantitative and unbiased analysis of directional  
705 persistence in cell migration." Nat Protoc **9**(8): 1931-1943.
- 706 Greenberg, M. L., Y. Yu, S. Leverrier, S. L. Zhang, I. Parker and M. D. Cahalan (2013). "Orai1  
707 function is essential for T cell homing to lymph nodes." J Immunol **190**(7): 3197-3206.
- 708 Hartzell, C. A., K. I. Jankowska, J. K. Burkhardt and R. S. Lewis (2016). "Calcium influx through  
709 CRAC channels controls actin organization and dynamics at the immune synapse." Elife  
710 **5**.
- 711 Hou, X., L. Pedi, M. M. Diver and S. B. Long (2012). "Crystal structure of the calcium release-  
712 activated calcium channel Orai." Science **338**(6112): 1308-1313.
- 713 Jacobelli, J., R. S. Friedman, M. A. Conti, A. M. Lennon-Dumenil, M. Piel, C. M. Sorensen, R. S.  
714 Adelstein and M. F. Krummel (2010). "Confinement-optimized three-dimensional T cell  
715 amoeboid motility is modulated via myosin IIA-regulated adhesions." Nat Immunol  
716 **11**(10): 953-961.
- 717 Katakai, T., K. Habiro and T. Kinashi (2013). "Dendritic cells regulate high-speed interstitial T  
718 cell migration in the lymph node via LFA-1/ICAM-1." J Immunol **191**(3): 1188-1199.

- 719 Khan, O., M. Headley, A. Gerard, W. Wei, L. Liu and M. F. Krummel (2011). "Regulation of T  
720 cell priming by lymphoid stroma." PLoS One **6**(11): e26138.
- 721 Korkotian, E., E. Oni-Biton and M. Segal (2017). "The role of the store-operated calcium entry  
722 channel Orai1 in cultured rat hippocampal synapse formation and plasticity." J Physiol  
723 **595**(1): 125-140.
- 724 Krummel, M. F., F. Bartumeus and A. Gerard (2016). "T cell migration, search strategies and  
725 mechanisms." Nat Rev Immunol **16**(3): 193-201.
- 726 Krummel, M. F., R. S. Friedman and J. Jacobelli (2014). "Modes and mechanisms of T cell  
727 motility: roles for confinement and Myosin-IIA." Curr Opin Cell Biol **30C**: 9-16.
- 728 Kuras, Z., Y. H. Yun, A. A. Chimote, L. Neumeier and L. Conforti (2012). "KCa3.1 and TRPM7  
729 channels at the uropod regulate migration of activated human T cells." PLoS One **7**(8):  
730 e43859.
- 731 Liou, J., M. L. Kim, W. D. Heo, J. T. Jones, J. W. Myers, J. E. Ferrell, Jr. and T. Meyer (2005).  
732 "STIM is a Ca<sup>2+</sup> sensor essential for Ca<sup>2+</sup>-store-depletion-triggered Ca<sup>2+</sup> influx." Curr  
733 Biol **15**(13): 1235-1241.
- 734 Lioudyno, M. I., J. A. Kozak, A. Penna, O. Safrina, S. L. Zhang, D. Sen, J. Roos, K. A.  
735 Stauderman and M. D. Cahalan (2008). "Orai1 and STIM1 move to the immunological  
736 synapse and are up-regulated during T cell activation." Proc Natl Acad Sci U S A **105**(6):  
737 2011-2016.
- 738 Luik, R. M., M. M. Wu, J. Buchanan and R. S. Lewis (2006). "The elementary unit of store-  
739 operated Ca<sup>2+</sup> entry: local activation of CRAC channels by STIM1 at ER-plasma  
740 membrane junctions." J Cell Biol **174**(6): 815-825.
- 741 Matheu, M. P., S. Othy, M. L. Greenberg, T. X. Dong, M. Schuijs, K. Deswarte, H. Hammad, B.  
742 N. Lambrecht, I. Parker and M. D. Cahalan (2015). "Imaging regulatory T cell dynamics  
743 and CTLA4-mediated suppression of T cell priming." Nat Commun **6**: 6219.
- 744 Maus, M., M. Cuk, B. Patel, J. Lian, M. Ouimet, U. Kaufmann, J. Yang, R. Horvath, H. T. Hornig-  
745 Do, Z. M. Chrzanowska-Lightowlers, K. J. Moore, A. M. Cuervo and S. Feske (2017).  
746 "Store-Operated Ca<sup>2+</sup> Entry Controls Induction of Lipolysis and the Transcriptional  
747 Reprogramming to Lipid Metabolism." Cell Metab.
- 748 Mempel, T. R., S. E. Henrickson and U. H. Von Andrian (2004). "T-cell priming by dendritic cells  
749 in lymph nodes occurs in three distinct phases." Nature **427**(6970): 154-159.
- 750 Miller, M. J., A. S. Hejazi, S. H. Wei, M. D. Cahalan and I. Parker (2004). "T cell repertoire  
751 scanning is promoted by dynamic dendritic cell behavior and random T cell motility in the  
752 lymph node." Proc Natl Acad Sci U S A **101**(4): 998-1003.

- 753 Miller, M. J., S. H. Wei, I. Parker and M. D. Cahalan (2002). "Two-photon imaging of lymphocyte  
754 motility and antigen response in intact lymph node." Science **296**(5574): 1869-1873.
- 755 Moreau, H. D., F. Lemaitre, K. R. Garrod, Z. Garcia, A. M. Lennon-Dumenil and P. Bousso  
756 (2015). "Signal strength regulates antigen-mediated T-cell deceleration by distinct  
757 mechanisms to promote local exploration or arrest." Proc Natl Acad Sci U S A **112**(39):  
758 12151-12156.
- 759 Morley, S. C. (2013). "The actin-bundling protein L-plastin supports T-cell motility and  
760 activation." Immunol Rev **256**(1): 48-62.
- 761 Mosier, D. E., R. J. Gulizia, S. M. Baird and D. B. Wilson (1988). "Transfer of a functional  
762 human immune system to mice with severe combined immunodeficiency." Nature  
763 **335**(6187): 256-259.
- 764 Mrass, P., J. Petravic, M. P. Davenport and W. Weninger (2010). "Cell-autonomous and  
765 environmental contributions to the interstitial migration of T cells." Semin Immunopathol  
766 **32**(3): 257-274.
- 767 Negulescu, P. A., T. B. Krasieva, A. Khan, H. H. Kerschbaum and M. D. Cahalan (1996).  
768 "Polarity of T cell shape, motility, and sensitivity to antigen." Immunity **4**(5): 421-430.
- 769 Petrie, R. J., A. D. Doyle and K. M. Yamada (2009). "Random versus directionally persistent cell  
770 migration." Nat Rev Mol Cell Biol **10**(8): 538-549.
- 771 Prakriya, M., S. Feske, Y. Gwack, S. Srikanth, A. Rao and P. G. Hogan (2006). "Orai1 is an  
772 essential pore subunit of the CRAC channel." Nature **443**(7108): 230-233.
- 773 Roos, J., P. J. DiGregorio, A. V. Yeromin, K. Ohlsen, M. Lioudyno, S. Zhang, O. Safrina, J. A.  
774 Kozak, S. L. Wagner, M. D. Cahalan, G. Velicelebi and K. A. Stauderman (2005).  
775 "STIM1, an essential and conserved component of store-operated Ca<sup>2+</sup> channel  
776 function." J Cell Biol **169**(3): 435-445.
- 777 Schaff, U. Y., N. Dixit, E. Procyk, I. Yamayoshi, T. Tse and S. I. Simon (2010). "Orai1 regulates  
778 intracellular calcium, arrest, and shape polarization during neutrophil recruitment in  
779 shear flow." Blood **115**(3): 657-666.
- 780 Shultz, L. D., P. A. Schweitzer, S. W. Christianson, B. Gott, I. B. Schweitzer, B. Tennent, S.  
781 McKenna, L. Mobraaten, T. V. Rajan, D. L. Greiner and et al. (1995). "Multiple defects in  
782 innate and adaptive immunologic function in NOD/LtSz-scid mice." J Immunol **154**(1):  
783 180-191.
- 784 Stefanova, I., J. R. Dorfman and R. N. Germain (2002). "Self-recognition promotes the foreign  
785 antigen sensitivity of naive T lymphocytes." Nature **420**(6914): 429-434.

- 786 Svensson, L., A. McDowall, K. M. Giles, P. Stanley, S. Feske and N. Hogg (2010). "Calpain 2  
787 controls turnover of LFA-1 adhesions on migrating T lymphocytes." PLoS One **5**(11):  
788 e15090.
- 789 Vaeth, M., J. Yang, M. Yamashita, I. Zee, M. Eckstein, C. Knosp, U. Kaufmann, P. Karoly Jani,  
790 R. S. Lacruz, V. Flockerzi, I. Kacs Kovics, M. Prakriya and S. Feske (2017). "ORAI2  
791 modulates store-operated calcium entry and T cell-mediated immunity." Nat Commun **8**:  
792 14714.
- 793 Vig, M., A. Beck, J. M. Billingsley, A. Lis, S. Parvez, C. Peinelt, D. L. Koomoa, J. Soboloff, D. L.  
794 Gill, A. Fleig, J. P. Kinet and R. Penner (2006). "CRACM1 multimers form the ion-  
795 selective pore of the CRAC channel." Curr Biol **16**(20): 2073-2079.
- 796 Waite, J. C., S. Vardhana, P. J. Shaw, J. E. Jang, C. A. McCarl, T. O. Cameron, S. Feske and  
797 M. L. Dustin (2013). "Interference with Ca(2+) release activated Ca(2+) (CRAC) channel  
798 function delays T-cell arrest in vivo." Eur J Immunol **43**(12): 3343-3354.
- 799 Wei, S. H., I. Parker, M. J. Miller and M. D. Cahalan (2003). "A stochastic view of lymphocyte  
800 motility and trafficking within the lymph node." Immunol Rev **195**: 136-159.
- 801 Wei, S. H., O. Safrina, Y. Yu, K. R. Garrod, M. D. Cahalan and I. Parker (2007). "Ca<sup>2+</sup> signals  
802 in CD4<sup>+</sup> T cells during early contacts with antigen-bearing dendritic cells in lymph node."  
803 J Immunol **179**(3): 1586-1594.
- 804 Wu, M. M., E. D. Covington and R. S. Lewis (2014). "Single-molecule analysis of diffusion and  
805 trapping of STIM1 and Orai1 at endoplasmic reticulum-plasma membrane junctions."  
806 Mol Biol Cell **25**(22): 3672-3685.
- 807 Yeromin, A. V., S. L. Zhang, W. Jiang, Y. Yu, O. Safrina and M. D. Cahalan (2006). "Molecular  
808 identification of the CRAC channel by altered ion selectivity in a mutant of Orai." Nature  
809 **443**(7108): 226-229.
- 810 Zhang, S. L., A. V. Yeromin, X. H. Zhang, Y. Yu, O. Safrina, A. Penna, J. Roos, K. A.  
811 Stauderman and M. D. Cahalan (2006). "Genome-wide RNAi screen of Ca(2+) influx  
812 identifies genes that regulate Ca(2+) release-activated Ca(2+) channel activity." Proc  
813 Natl Acad Sci U S A **103**(24): 9357-9362.
- 814 Zhang, S. L., Y. Yu, J. Roos, J. A. Kozak, T. J. Deerinck, M. H. Ellisman, K. A. Stauderman and  
815 M. D. Cahalan (2005). "STIM1 is a Ca<sup>2+</sup> sensor that activates CRAC channels and  
816 migrates from the Ca<sup>2+</sup> store to the plasma membrane." Nature **437**(7060): 902-905.
- 817

## 818 **Figure Legends**

819 **Figure 1. Effects of expressing Orai1-E106A on human T cells.** (A) Averaged  
820 thapsigargin-induced  $\text{Ca}^{2+}$  entry, measured by fura-2, in activated human  $\text{CD4}^+$  T cells  
821 transfected with eGFP-Orai1-E106A (left) or empty vector control (EV, right,  $n = 133$   
822 cells); eGFP-E106A transfected cells were grouped into two populations, either eGFP-  
823 E106A<sup>hi</sup> with high eGFP fluorescence (solid squares,  $n = 43$  cells) or eGFP-E106A<sup>lo</sup> with  
824 no detectable eGFP fluorescence (empty squares,  $n = 115$  cells); bars represent SEM.  
825 (B) Primary human  $\text{CD4}^+$  and  $\text{CD8}^+$  T cells were transfected with eGFP-E106A, then  
826 uniformly labeled with the fluorescent cell tracker dye CMTMR and co-cultured with SEB-  
827 pulsed primary human dendritic cells from the same donor; proliferation was assessed  
828 after 72 hr by CMTMR dilution as measured by flow cytometry. (C) Human  $\text{CD3}^+$  T cells  
829 were transfected with eGFP-E106A and expression level was measured 3 hr post-  
830 transfection before adoptive transfer into reconstituted NOD.SCI.β2 mice; cells were  
831 recovered from lymph nodes 18 hr later and eGFP fluorescence was used to measure  
832 homing to lymph nodes.

833 **Figure 1-figure supplement 1. Protocol for homing and two-photon imaging of**  
834 **transfected human  $\text{CD3}^+$  T cells in reconstituted NOD.SCID.β2 mouse lymph node.**

835 **Figure 2. Orai1 block increases human T cell motility within reconstituted**  
836 **NOD.SCID.β2 lymph nodes.** (A) Two-photon microscopy of migrating human T cells,  
837 showing eGFP-E106A transfected cells in green and CMTMR-labeled mock transfected  
838 cells in red, within intact mouse lymph node 18 hr after adoptive co-transfer of  $5 \times 10^6$  of  
839 each cell type. (B) Average cell velocities of eGFP-E106A<sup>hi</sup> ( $n = 50$ ) versus CMTMR-  
840 labeled control ( $n = 71$ ) T cells; bars represent mean  $\pm$  SEM, data from independent  
841 experiments using 4 different donors ( $12.8 \pm 0.5 \mu\text{m}/\text{min}$  vs.  $11.1 \pm 0.5 \mu\text{m}/\text{min}$  for E106A<sup>hi</sup>  
842 vs CMTMR cells,  $p = 0.0268$ ). (C) Maximum and minimum cellular instantaneous  
843 velocities of eGFP-E106A<sup>hi</sup> (green) versus CMTMR-labeled (red) control T cells.  
844 (Hodges-Lehmann median difference of  $-0.21 \mu\text{m}/\text{min}$ ,  $-2.82$  to  $2.16 \mu\text{m}/\text{min}$  95%  
845 confidence interval for maximum velocity and  $-0.36 \mu\text{m}/\text{min}$ ,  $-1.02$  to  $0.36 \mu\text{m}/\text{min}$  95%  
846 confidence interval for minimum velocity) (D) Superimposed tracks with their origins  
847 normalized to the starting point. Cells were tracked for more than 20 min.  $n = 111$

848 (CMTMR), n=58 (eGFP-E106A<sup>hi</sup>) (E) Directionality ratio (displacement / distance) over  
849 elapsed time. For Orai1-blocked cells in green, tau = 397 sec; vs CMTMR controls in red,  
850 tau = 238 sec, n = 49 time points. (F) Histogram of turn angles in eGFP-E106A<sup>hi</sup> (green)  
851 and CMTMR controls (red). Mean ± SEM, 74.5 ± 1.0 degrees for Orai1 blocked cells vs  
852 86.5 ± 1.5 degrees for CMTMR controls, p = 0.0001, two-tailed T test. (G) Arrest  
853 coefficients of eGFP-E106A<sup>hi</sup> compared with CMTMR-labeled control T cells, defined as  
854 fraction of time with instantaneous velocity < 2 μm/min. (For Orai1-blocked cells in green,  
855 0.02 ± 0.01; vs. CMTMR controls in red, 0.12 ± 0.03, p = 0.0406) (H) Frequency  
856 distribution of average cell velocities for eGFP-E106A<sup>hi</sup> (top) and CMTMR-labeled control  
857 T cells (bottom), cells with average velocity < 7 μm/min are highlighted in gray; tick marks  
858 denote the center of every other bin. (I,J) Average cell velocities (I) and arrest coefficients  
859 (J) of eGFP-E106A<sup>hi</sup> (green, n = 102) vs CMTMR-labeled control (red, n = 278) human T  
860 cells in NK cell depleted immunodeficient mouse lymph nodes. Average cell velocities:  
861 11.0 ± 0.5 μm/min vs. 8.8 ± 0.3 μm/min, p = 0.0004; Arrest coefficients: 0.10 ± 0.02 vs.  
862 0.16 ± 0.01, p = 0.0516 for E106A<sup>hi</sup> vs CMTMT cells; bars represent mean ± SEM, data  
863 from independent experiments using 8 different donors, \*\*\* = p < 0.005.

864

865 **Figure 3. Orai1 block reduces frequency of pausing during human T cell motility in**  
866 **vitro. (A,B)** Confocal microscopy of eGFP-E106A transfected human CD4<sup>+</sup> T cells in  
867 microfabricated channels 7 μm high by 8 μm wide, showing two individual eGFP-E106A<sup>hi</sup>  
868 T cells (A) and two eGFP-E106A<sup>lo</sup> T cells (B), each circled in red in the first frame;  
869 individual images taken 1 min apart, scale bar = 10 μm. (C) Comparison of average cell  
870 velocities of eGFP-E106A transfected T cells (eGFP-E106A<sup>hi</sup> cells in green, n = 102;  
871 eGFP-E106A<sup>lo</sup> cells in gray, n = 131; 14.2 ± 0.6 μm/min vs. 10.9 ± 0.5 μm/min, p < 0.0001  
872 for E106A<sup>hi</sup> vs E106A<sup>lo</sup> cells) and eGFP-Orai1 transfected control T cells (eGFP-Orai1<sup>hi</sup>  
873 cells in green, n = 43; eGFP-Orai1<sup>lo</sup> cells in gray, n = 76; 10.7 ± 0.8 μm/min vs. 10.5 ± 0.8  
874 μm/min for Orai1<sup>hi</sup> vs Orai1<sup>lo</sup> cells; Hodges-Lehmann median difference of -0.84 μm/min,  
875 -2.96 to 1.28 μm/min 95%CI); bars represent mean ± SEM, data from independent  
876 experiments using 5 different donors. (D) Frequency distribution of average cell velocities  
877 of eGFP-E106A<sup>hi</sup> (top) and eGFP-E106A<sup>lo</sup> (bottom) human T cells, cells with average  
878 velocity < 7 μm/min are highlighted in gray; tick marks denote the center of every other



879 bin. **(E)** Arrest coefficients of eGFP-E106A<sup>hi</sup> vs eGFP-E106A<sup>lo</sup> human T cells, defined as  
880 fraction of time each individual cell had an instantaneous velocity < 2  $\mu\text{m}/\text{min}$  ( $0.05 \pm 0.01$   
881 vs.  $0.08 \pm 0.01$  for E106A<sup>hi</sup> vs E106A<sup>lo</sup> cells,  $p = 0.0015$ ); **(F)** Variance in velocity of eGFP-  
882 E106A<sup>hi</sup> vs eGFP-E106A<sup>lo</sup> human T cells, coefficient of variation is calculated by standard  
883 deviation divided by the mean of instantaneous velocity for each individual cell ( $39.5 \pm$   
884  $1.9 \%$  vs.  $45.1 \pm 1.6 \%$  for E106A<sup>hi</sup> vs E106A<sup>lo</sup> cells,  $p = 0.0138$ );. **(G)** Duration of pauses  
885 for eGFP-E106A<sup>hi</sup> vs eGFP-E106A<sup>lo</sup> human T cells (Hodges-Lehmann median difference  
886 of 0 seconds, -8.43 to 4.71 seconds 95%CI for E106A<sup>hi</sup> vs E106A<sup>lo</sup> cells); bars represent  
887 mean  $\pm$  SEM, \* =  $p < 0.05$ , \*\* =  $p < 0.01$ , \*\*\* =  $p < 0.005$ , \*\*\*\* =  $p < 0.001$ .

888 **Figure 4. Tracking Ca<sup>2+</sup> signals in human T cells in vitro with Salsa6f.** **(A,C)** Confocal  
889 microscopy of Salsa6f transfected human CD4<sup>+</sup> T cells in ICAM-1 coated microchannels  
890 7  $\mu\text{m}$  high by 8  $\mu\text{m}$  wide **(A, Video 5)** and open space **(C, Video 6)**, showing merged red  
891 (tdTomato), green (GCaMP6f), and DIC channels; circular structures shown in **(C)** are  
892 support pillars part of the PDMS chamber; scale bar = 10  $\mu\text{m}$ , time = sec;. **(B,D)** Total  
893 intensity tracings of GCaMP6f (green) and tdTomato (red) fluorescence, G/R ratio  
894 (orange), and speed (black), for corresponding T cells shown in **(A)** and **(C)**; data  
895 representative of independent experiments from three different donors.

896 **Figure 5. Spontaneous Ca<sup>2+</sup> signals during human T cell motility in vitro are**  
897 **correlated with reduced velocity.** **(A,B)** Sample tracks from Salsa6f-transfected human  
898 T cells in microchannels, with intracellular Ca<sup>2+</sup> levels as G/R ratios for each time point,  
899 normalized to zero-time (orange), overlaid with instantaneous cell velocity (black), cells  
900 in **(A)** have stable Ca<sup>2+</sup> levels, cells in **(B)** show brief Ca<sup>2+</sup> transients (arrowheads) or  
901 sustained Ca<sup>2+</sup> signaling (gray highlights). **(C)** Instantaneous velocity of Salsa6f-  
902 transfected human T cells in microchannels during elevated cytosolic Ca<sup>2+</sup> levels (red)  
903 and during basal Ca<sup>2+</sup> levels (green);  $n = 22$  cells, data from independent experiments  
904 using three different donors; \*\*\*\* =  $p < 0.001$ . **(D)** Scatter plot of Salsa transfected human  
905 T cells in microchannels, instantaneous cell velocity versus normalized G/R ratio for each  
906 individual time point analyzed; red numbers in each quadrant show percent of time points,  
907 split by 1.10 normalized G/R ratio and 10  $\mu\text{m}/\text{min}$ ;  $n = 4081$  points. **(E)** Mean track velocity  
908 of eGFP-E106A transfected human T cells, comparing eGFP-E106A<sup>hi</sup> (green) versus

909 eGFP-E106A<sup>lo</sup> T cells (gray) in confined microchannels vs open space; n = 30, 44, 33,  
910 and 62 cells, respectively ( $15.4 \pm 1.2 \mu\text{m}/\text{min}$  vs.  $11.3 \pm 1.0 \mu\text{m}/\text{min}$  for E106A<sup>hi</sup> vs E106A<sup>lo</sup>  
911 cells in microchannels;  $p = 0.0099$  and  $12.0 \pm 1.0 \mu\text{m}/\text{min}$  vs.  $12.2 \pm 0.7 \mu\text{m}/\text{min}$  for  
912 E106A<sup>hi</sup> vs E106A<sup>lo</sup> cells in open space; Hodges-Lehmann median difference of  $0.15$   
913  $\mu\text{m}/\text{min}$ ,  $-2.46$  to  $2.40 \mu\text{m}/\text{min}$  95%CI); bars represent mean  $\pm$  SEM, data from  
914 independent experiments using two different donors, \* =  $p < 0.05$ , \*\* =  $p < 0.01$ . (F) Scatter  
915 plot of Salsa transfected human T cells in open space, instantaneous cell velocity versus  
916 GCaMP6f/tdTomato R/R<sub>0</sub> for each individual time point analyzed; red numbers in each  
917 quadrant show percent of cells, split by 1.10 normalized G/R ratio and  $10 \mu\text{m}/\text{min}$ ; n =  
918 723 points.

919  
920 **Figure 5-figure supplement 1. Tracking cell motility and Ca<sup>2+</sup> signals in CD4-**  
921 **Salsa6f<sup>+/-</sup> T cells on ICAM coated coverslips. (A)** Confocal microscopy of CD4-  
922 Salsa6f<sup>+/-</sup> Th1 cells on open-field ICAM-1 coated coverslips showing merged red  
923 (tdTomato) and green (GCaMP6f) channels at three different time points. Scale bar  $10$   
924  $\mu\text{m}$ . \* indicates movement of one cell. (B) Recordings of GCaMP6f (green), tdTomato  
925 (red) fluorescence, G/R ratio (orange), and speed (black), for corresponding T cell shown  
926 in (A). (C) Average cell velocities of CD4-Salsa6f<sup>+/-</sup> Th1 cells on  $5 \mu\text{g}/\text{ml}$  ICAM-1 coated  
927 coverslips (n = 52 cells, 2 independent experiments). (D) Scatter plot showing  
928 instantaneous cell velocity versus GCaMP6f/tdTomato (G/R) ratio for each individual time  
929 point analyzed; numbers show percent of time points, split by  $10 \mu\text{m}/\text{min}$ , as in **Figure 8**  
930 **D,F**; n = 5289 points.

931  
932 **Figure 6. Motility of Salsa6f T cells in lymph node following adoptive transfer.** CD4-  
933 Cre and CD4-Salsa6f<sup>+/+</sup> cells are shown in teal and in red, respectively. (A) Experimental  
934 design to characterize homing and motility of CD4-Salsa6f<sup>+/+</sup> cells. CTV-labeled CD4-Cre  
935 cells and CTY-labeled CD4-Salsa6f<sup>+/+</sup> cells (1:1) were adoptively transferred into wildtype  
936 mice, 18 hr prior to LN harvesting. (B) Paired numbers of CTV<sup>+</sup> and CTY<sup>+</sup> cells recovered  
937 from lymph nodes ( $p = 0.65$ , Mann Whitney test). (C) Representative median filtered,  
938 maximum intensity projection image showing simultaneously imaged CD4-Cre and CD4-  
939 Salsa6f<sup>+/+</sup> cells the lymph node, scale bar =  $30 \mu\text{m}$ . See **Video 1**. (D) Superimposed



940 tracks with their origins normalized to the starting point. Cells were tracked for more than  
941 20 min.  $n = 140$ . See Video 2. **(E)** Frequency distribution of instantaneous velocities;  
942 arrows indicate median, tick marks at the center of every other bin ( $n > 14,800$ , 3  
943 independent experiments). **(F)** Scatter plot showing mean track speed, black bars indicate  
944 overall mean values ( $11.1 \pm 0.4$  and  $10.7 \pm 0.4$   $\mu\text{m}/\text{min}$ , for CD4-Cre and CD4-Salsa6f<sup>+/+</sup>  
945 cells respectively,  $p = 0.69$ ;  $n = 140$ ). **(G)** Directionality ratio (displacement / distance) over  
946 elapsed time  $\tau = 461.2$  sec for CD4-Cre in teal; vs  $\tau = 474.1$  sec for CD4-Salsa6f<sup>+/+</sup>  
947 in red.  $n = 217$  time points. **(H)** MSD vs time, plotted on a log-log scale. **(I)** Measured  
948 motility coefficient from 140 tracks ( $35.1 \pm 3.2$  vs  $39.4 \pm 3.9$   $\mu\text{m}^2/\text{min}$  for CD4-Cre and  
949 CD4-Salsa6f<sup>+/+</sup> cells,  $p = 0.65$ ).

950 **Figure 7. Suppression of motility during spontaneous Ca<sup>2+</sup> transients.** **(A)** Median  
951 filtered, maximum intensity projection showing cytosolic labeling (exclusion of Salsa6f  
952 from the nucleus) in adoptively transferred CD4-Salsa6f<sup>+/+</sup> cells (red) in the lymph node  
953 of wildtype recipients. Autofluorescent structures appear as yellow bodies. Scale bar =  
954 20  $\mu\text{m}$ . See Video 2. **(B)** Scatterplot of instantaneous 3D velocity vs ratio of GCaMP6f  
955 (green) to tdTomato (red) fluorescence intensity ( $r = -0.24$ , Spearman's rank correlation,  
956  $p < 0.0001$ ,  $n = 4490$  pairs). **(C)** Image sequence showing a migrating T cell and calcium  
957 transient from **(A)**. Top row: TdTomato signal is shown in grayscale, overlaid with  
958 GCaMP6f signals in green. Scale bar = 10  $\mu\text{m}$ . Center row: Heat map of Green / Red  
959 ratios matched to corresponding images in the top row. Arrows indicate local Ca<sup>2+</sup>  
960 transient. Bottom row: inverted bar graph showing corresponding instantaneous 3D  
961 velocities. Asterisk marks a pause in cell motility. **(D)** Representative track from CD4-  
962 Salsa6f<sup>+/+</sup> T cells in lymph nodes, showing intracellular Ca<sup>2+</sup> levels measured by G/R ratio  
963 (orange) on left Y-axis and instantaneous 3D velocity (gray) on right Y-axis. **(E)** Averaged  
964 time course of the instantaneous 3D velocity (gray trace, right Y-axis) aligned by the  
965 corresponding rise in Salsa6f G/R ratio (orange, left Y-axis). The velocity minimum at time  
966 = 5 sec-is significantly lower than a baseline from -30 to -10 sec ( $p < 0.0001$  two-tailed T-  
967 test,  $n = 39$  cells).

968 **Figure 8. T cell Ca<sup>2+</sup> transients in the steady-state lymph node.** **(A)** Calcium history  
969 map of steady-state lymph node. Maximum intensity YT projection of 1200 processed

970 green channel time points showing localized sparkles (white arrows) and cell-wide global  
971  $\text{Ca}^{2+}$  transients (magenta arrows). Scale bar = 50  $\mu\text{m}$  along Y axis, 50 sec along T axis.  
972 See **Video 3**. **(B)** Frequency distribution of the area of local  $\text{Ca}^{2+}$  signals. **(C)** Frequency  
973 distribution of the duration of local  $\text{Ca}^{2+}$  signals.

974 **Figure 9. MHC block and  $\text{Ca}^{2+}$  transients in steady state lymph nodes.** **(A)** The  
975 frequency of cell-wide and local (sparkles)  $\text{Ca}^{2+}$  transients in CD-Salsa6f<sup>+/+</sup> lymph nodes  
976 48 hr after injection of MHC class I and II blocking antibodies (MHC), isotype control  
977 antibody (ITC), or no antibody (Con). Red bars indicate mean values. For MHC-blocked  
978 compared to ITC, the relative event frequencies were, for cell-wide:  $314 \pm 38$  vs  $553 \pm 77$ ,  
979 mean  $\pm$  SEM,  $p = 0.06$ ; for sparkles:  $532 \pm 44$  vs  $1343 \pm 272$ , mean  $\pm$  SEM,  $p = 0.02$ ,  
980 Mann Whitney test. **(B,C)** Integrated green channel intensities of  $\text{Ca}^{2+}$  transients  
981 normalized to SD of green channel for cell-wide events **(B)** and for sparkles **(C)**. Red bars  
982 indicate mean values. For MHC-blocked vs ITC, the relative amplitudes were, for cell-  
983 wide **(B)**:  $321 \pm 14$  vs  $350 \pm 15$ , mean  $\pm$  SEM; sparkles **(C)**:  $32 \pm 2$  vs  $37 \pm 2$ , mean  $\pm$   
984 SEM. **(D-G)** Representative thresholded images showing cell-wide and local  $\text{Ca}^{2+}$   
985 transients, 48 hr after treatment with anti MHC I and II or ITC antibody. The area of the  
986 imaging field analyzed is indicated. Scale bar = 100  $\mu\text{m}$ .

987

988

989 **Figure 1**

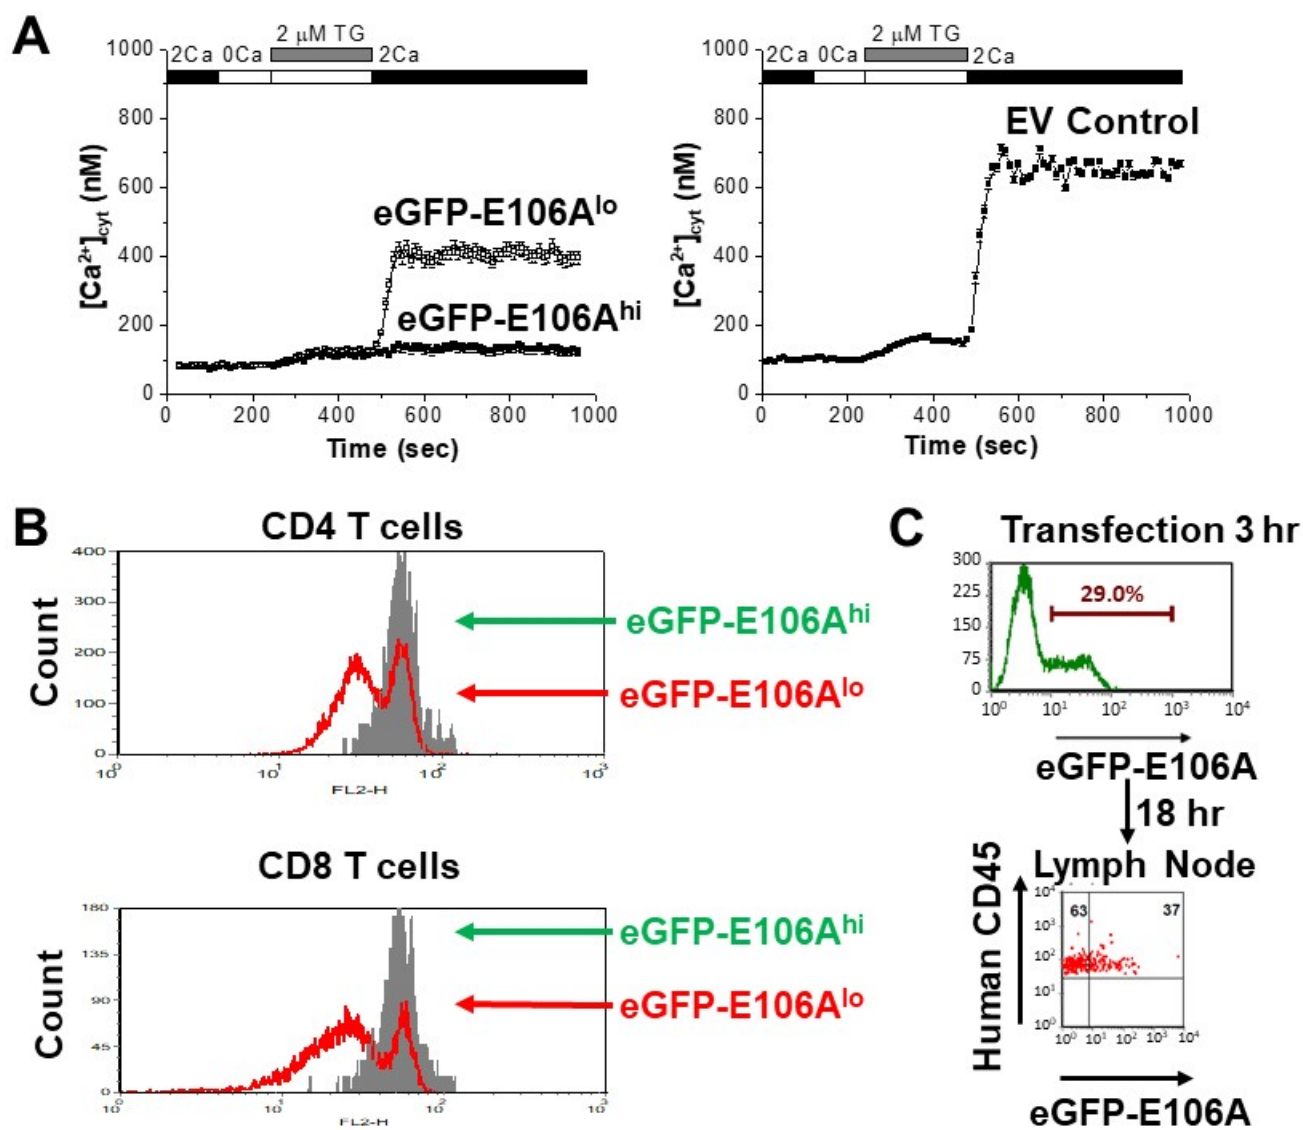

990

991

992 **Figure 1 Supplement 1**

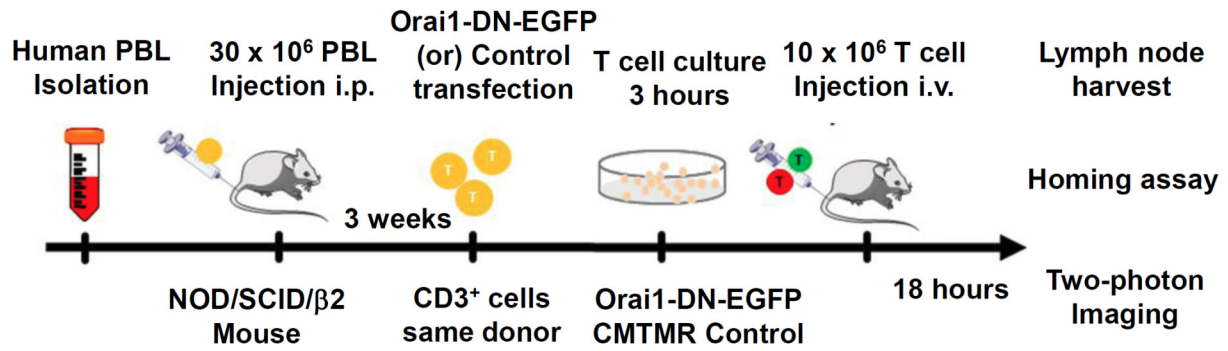

993

994

995 **Figure 2**

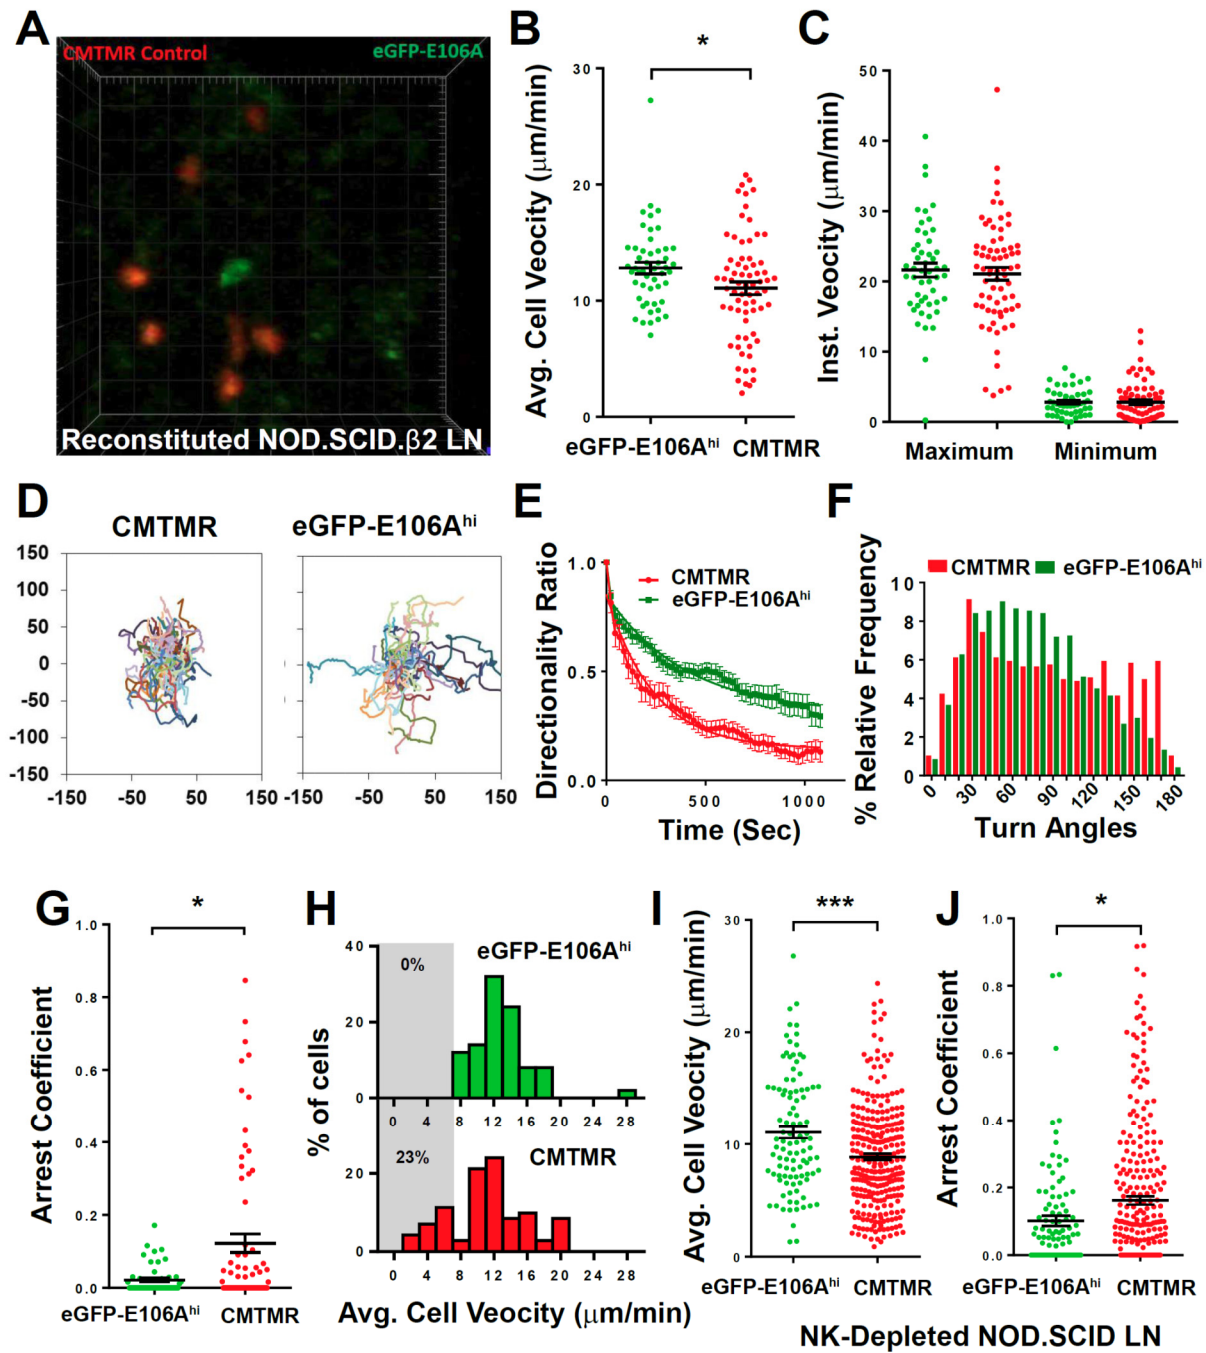

996

997

998 **Figure 3**

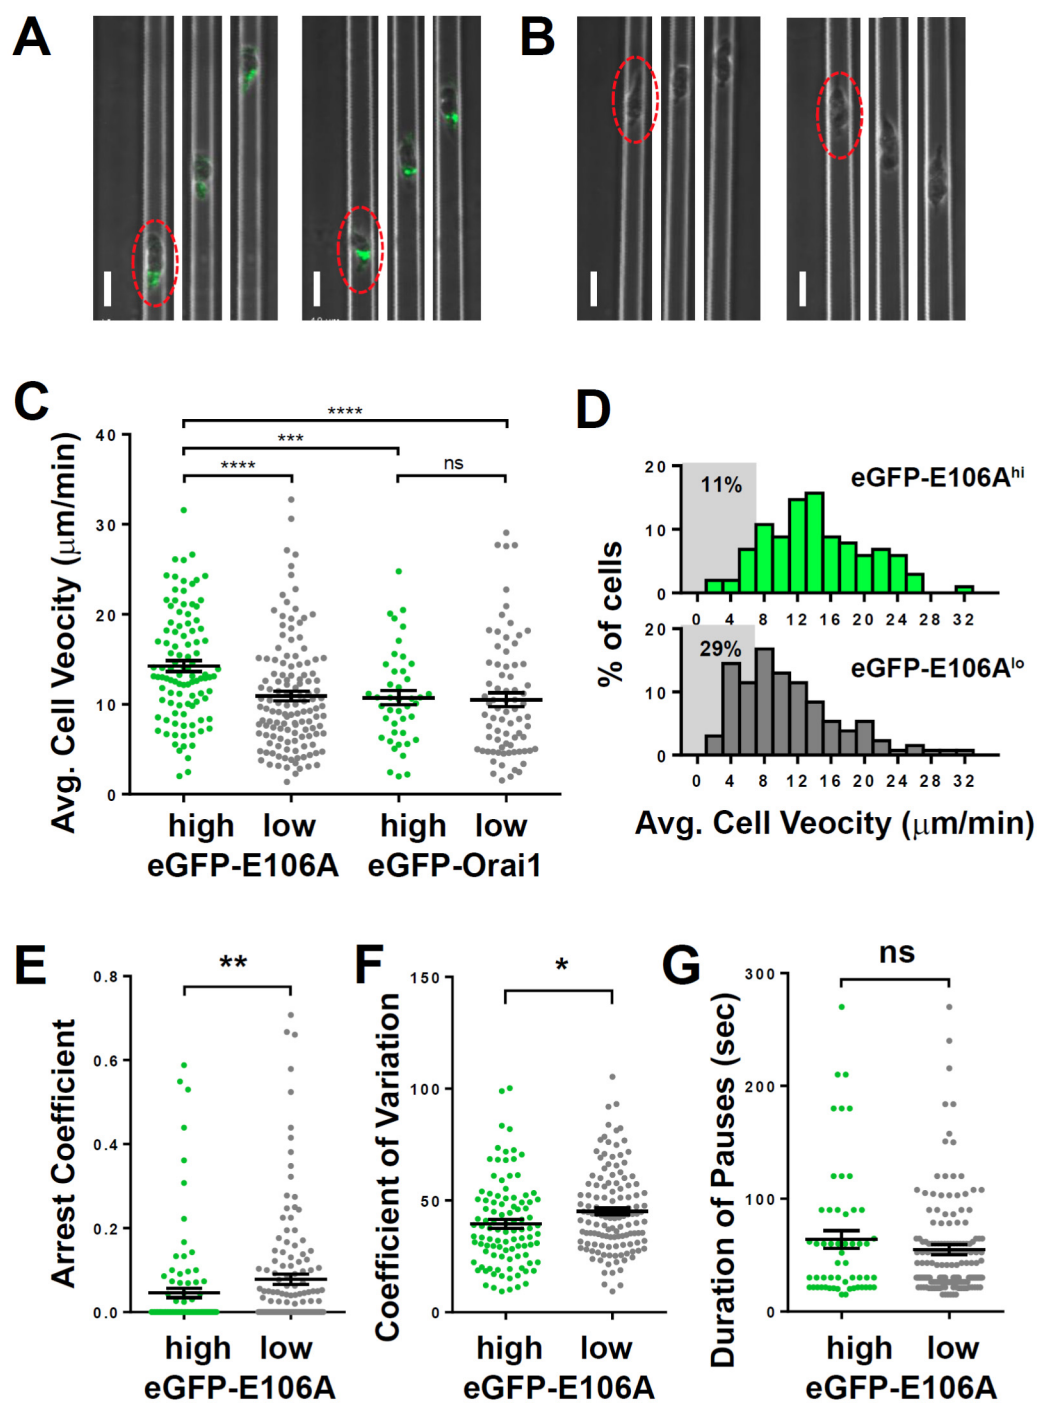

999

1000



1001 **Figure 4**

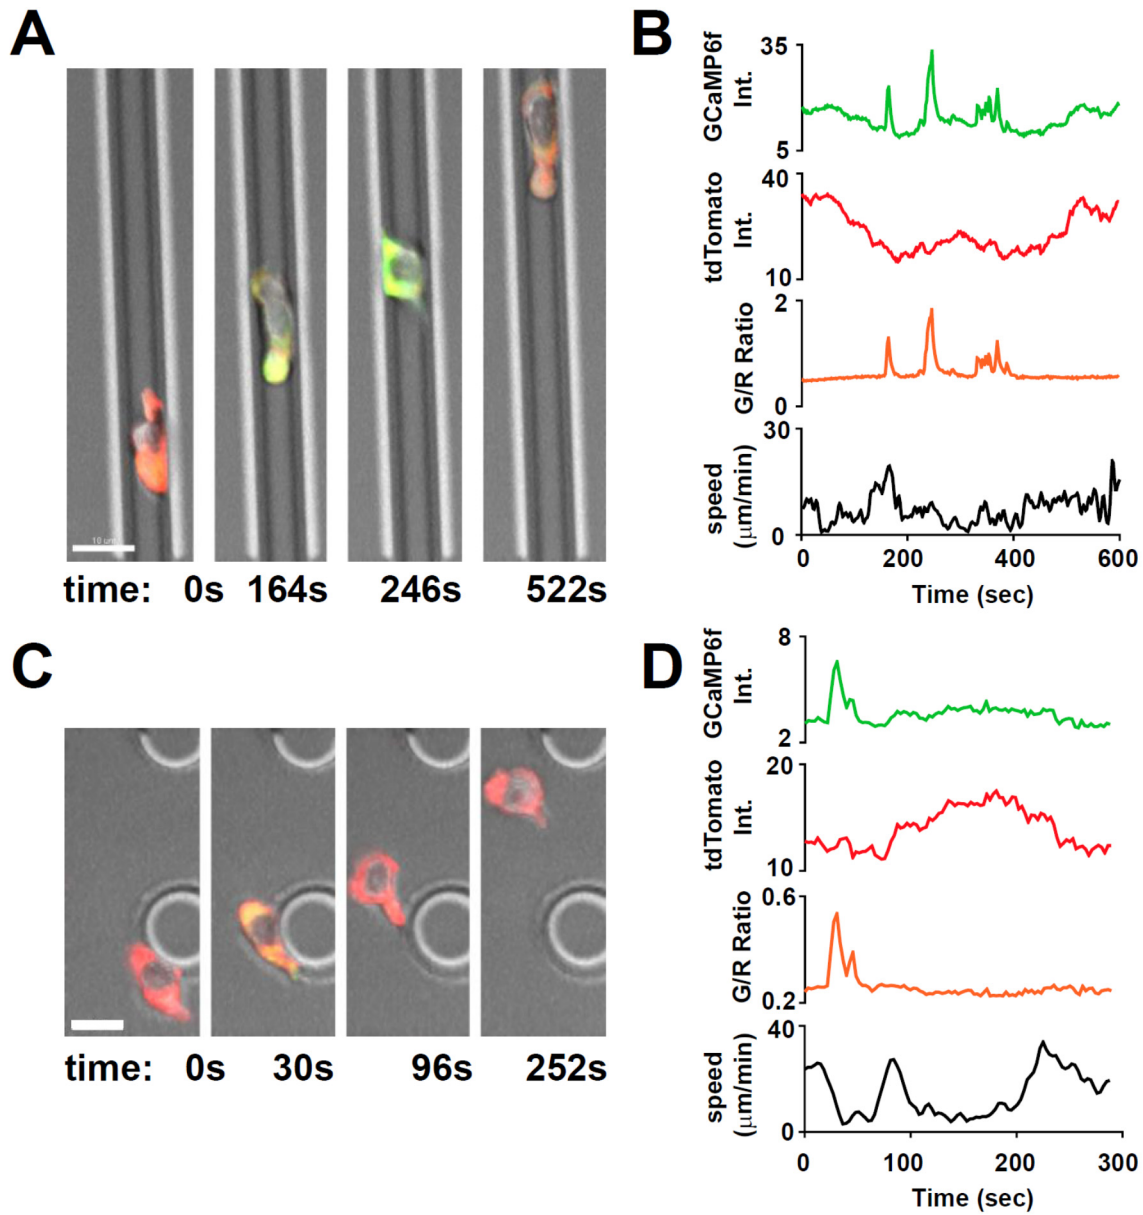

1002

1003

1004 **Figure 5**

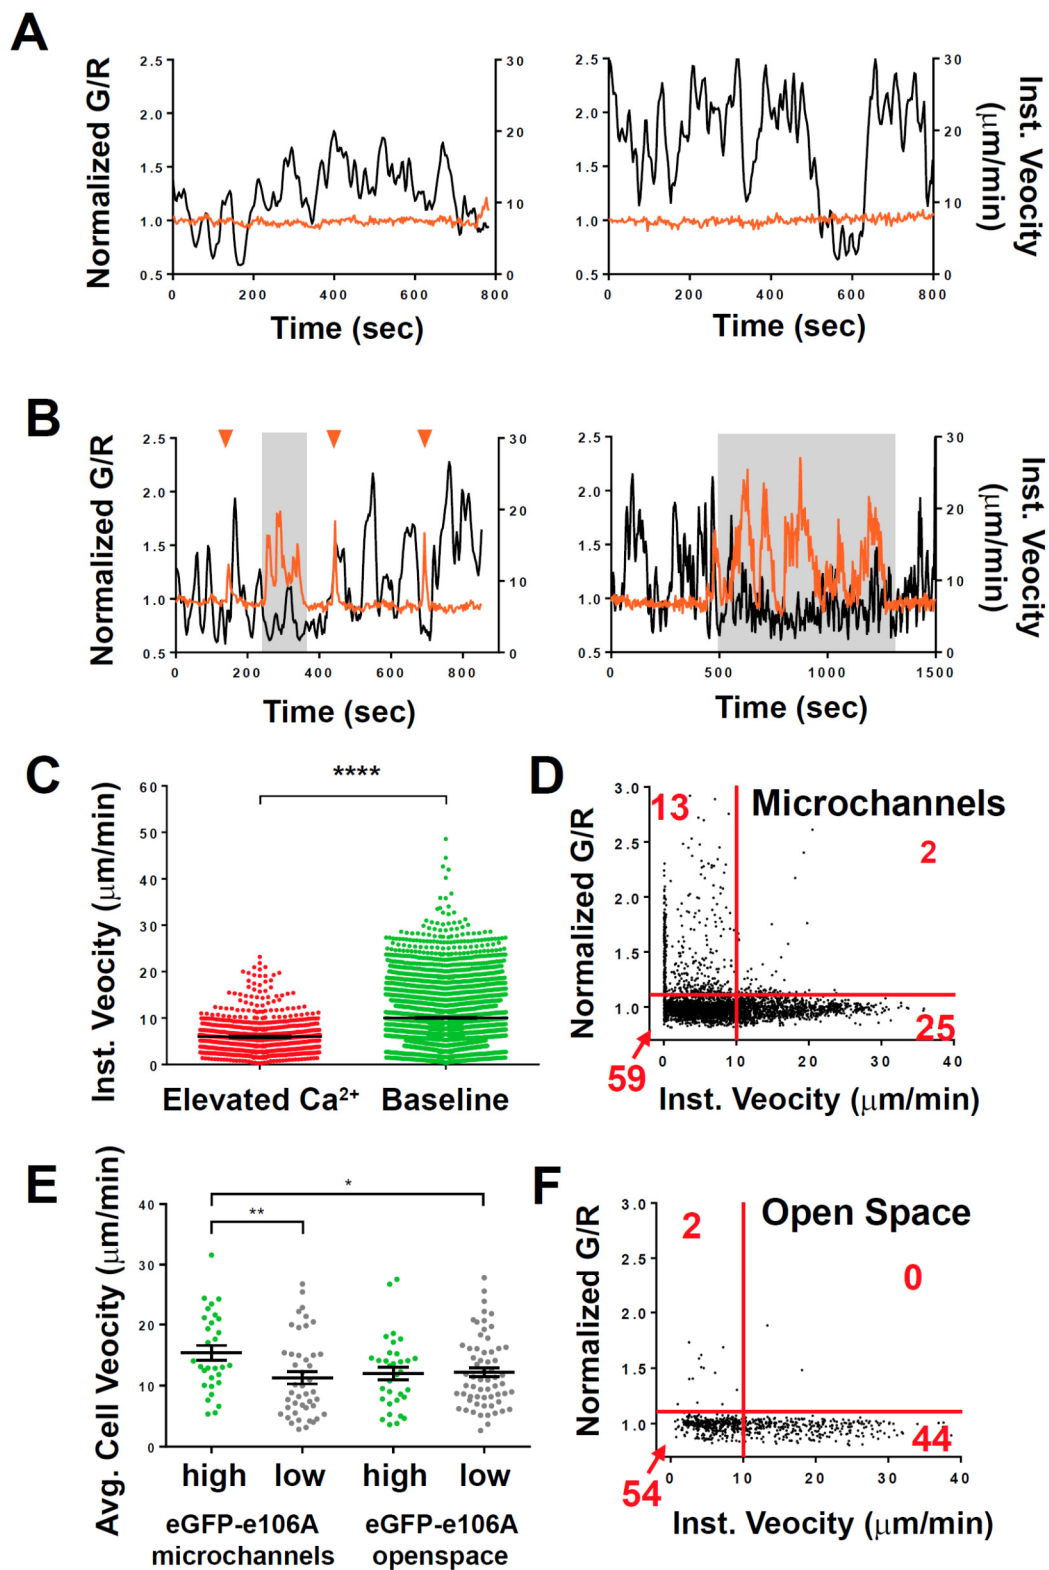

1005



1006 **Figure 5 Supplement 1**

1007

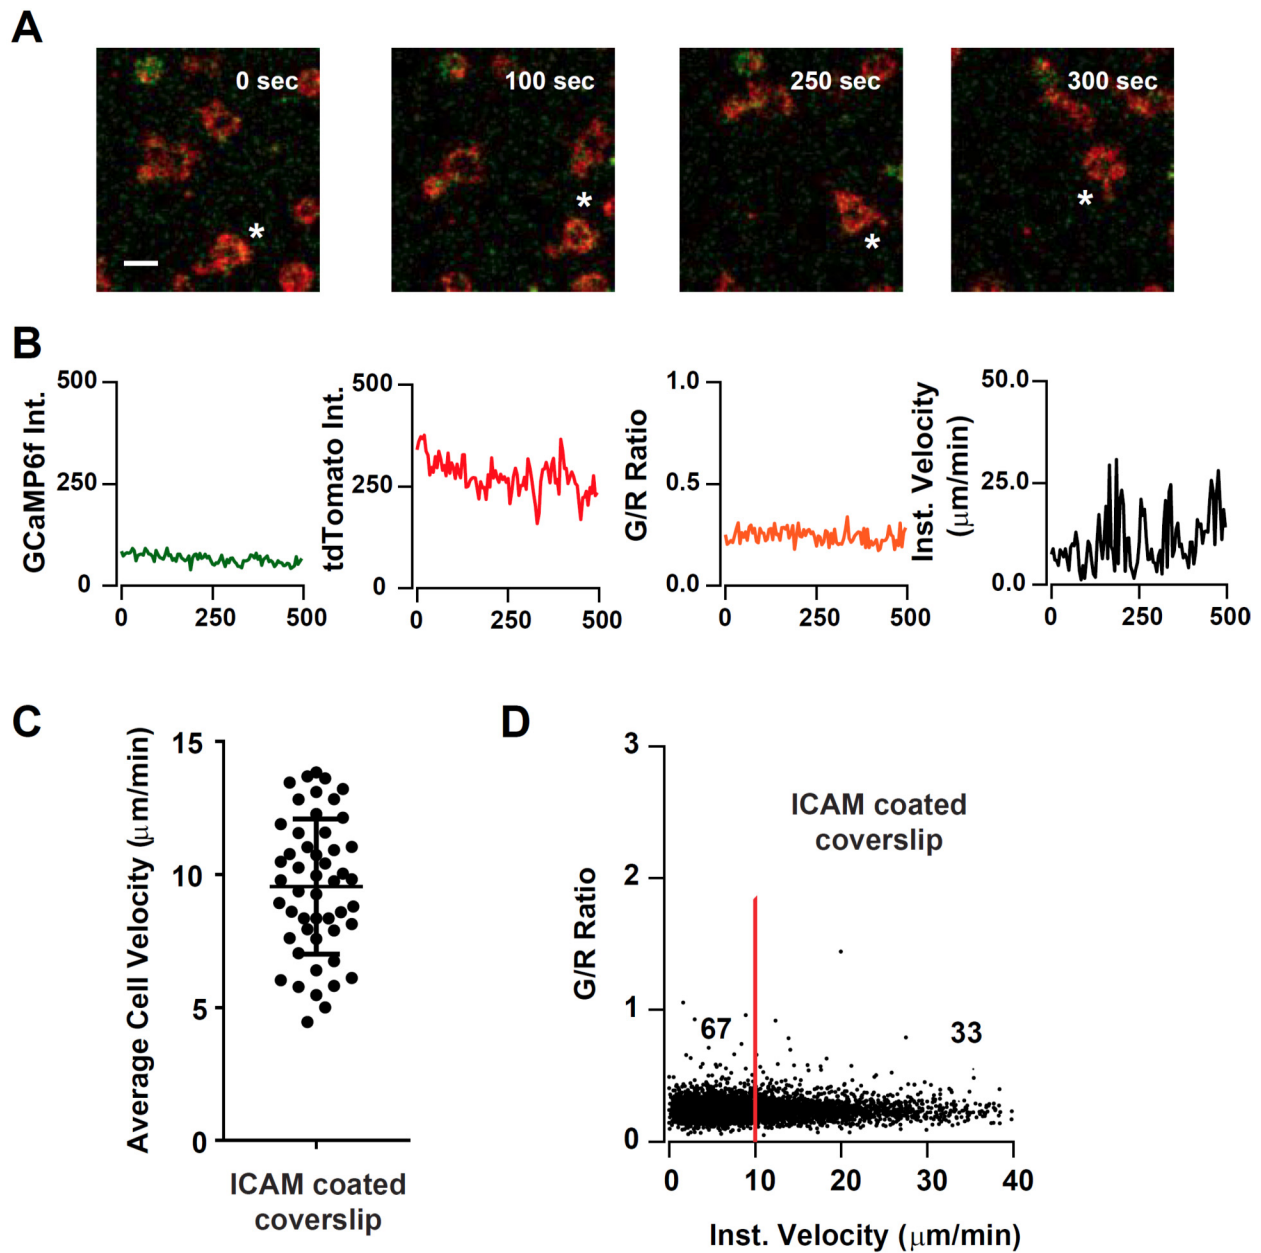

1008

1009 **Figure 6**

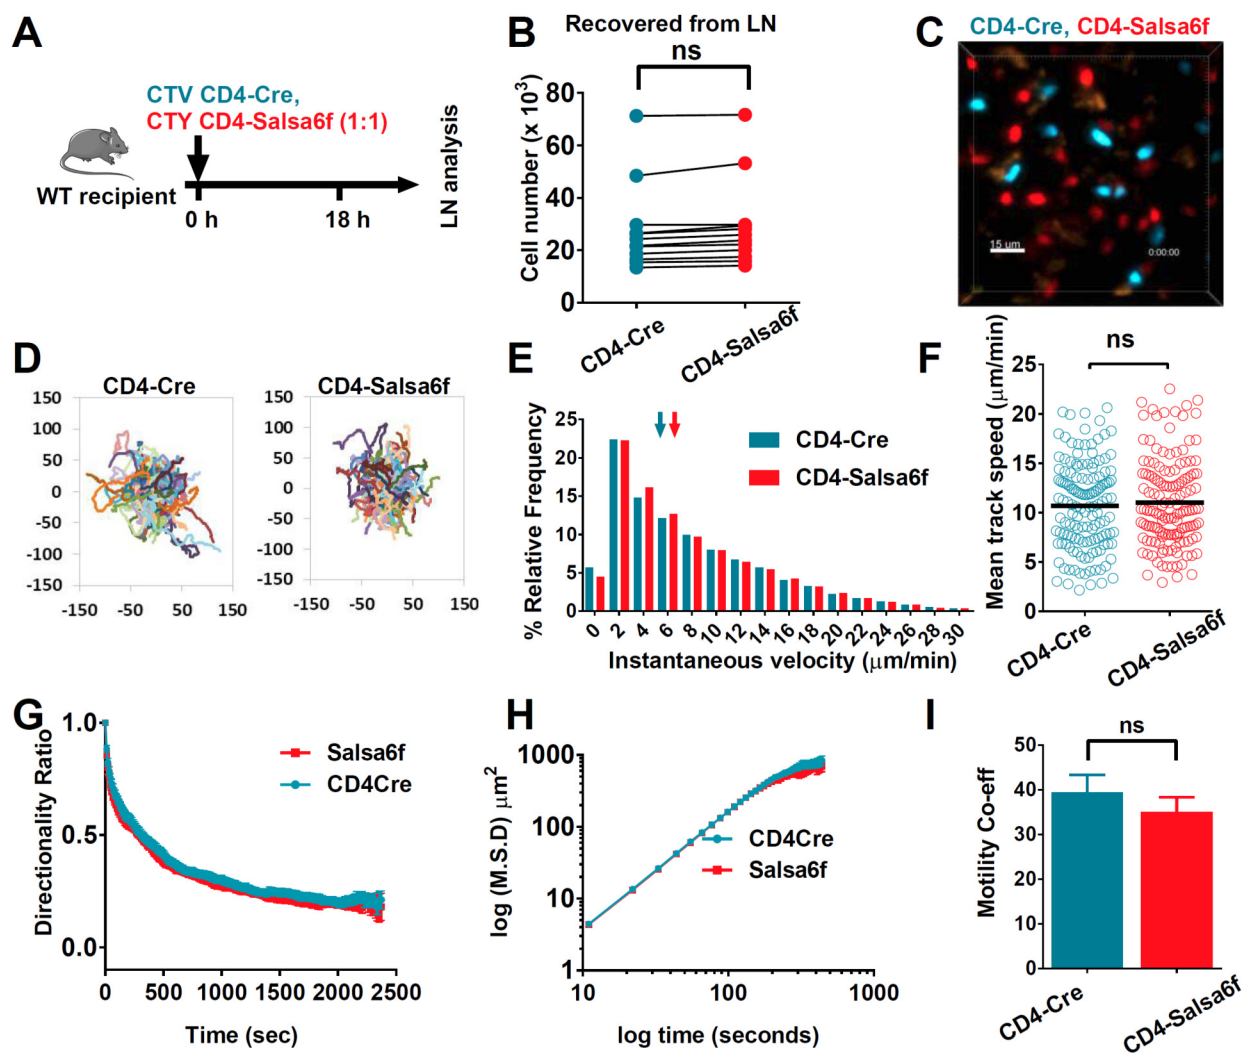

1010

1011

1012 **Figure 7**

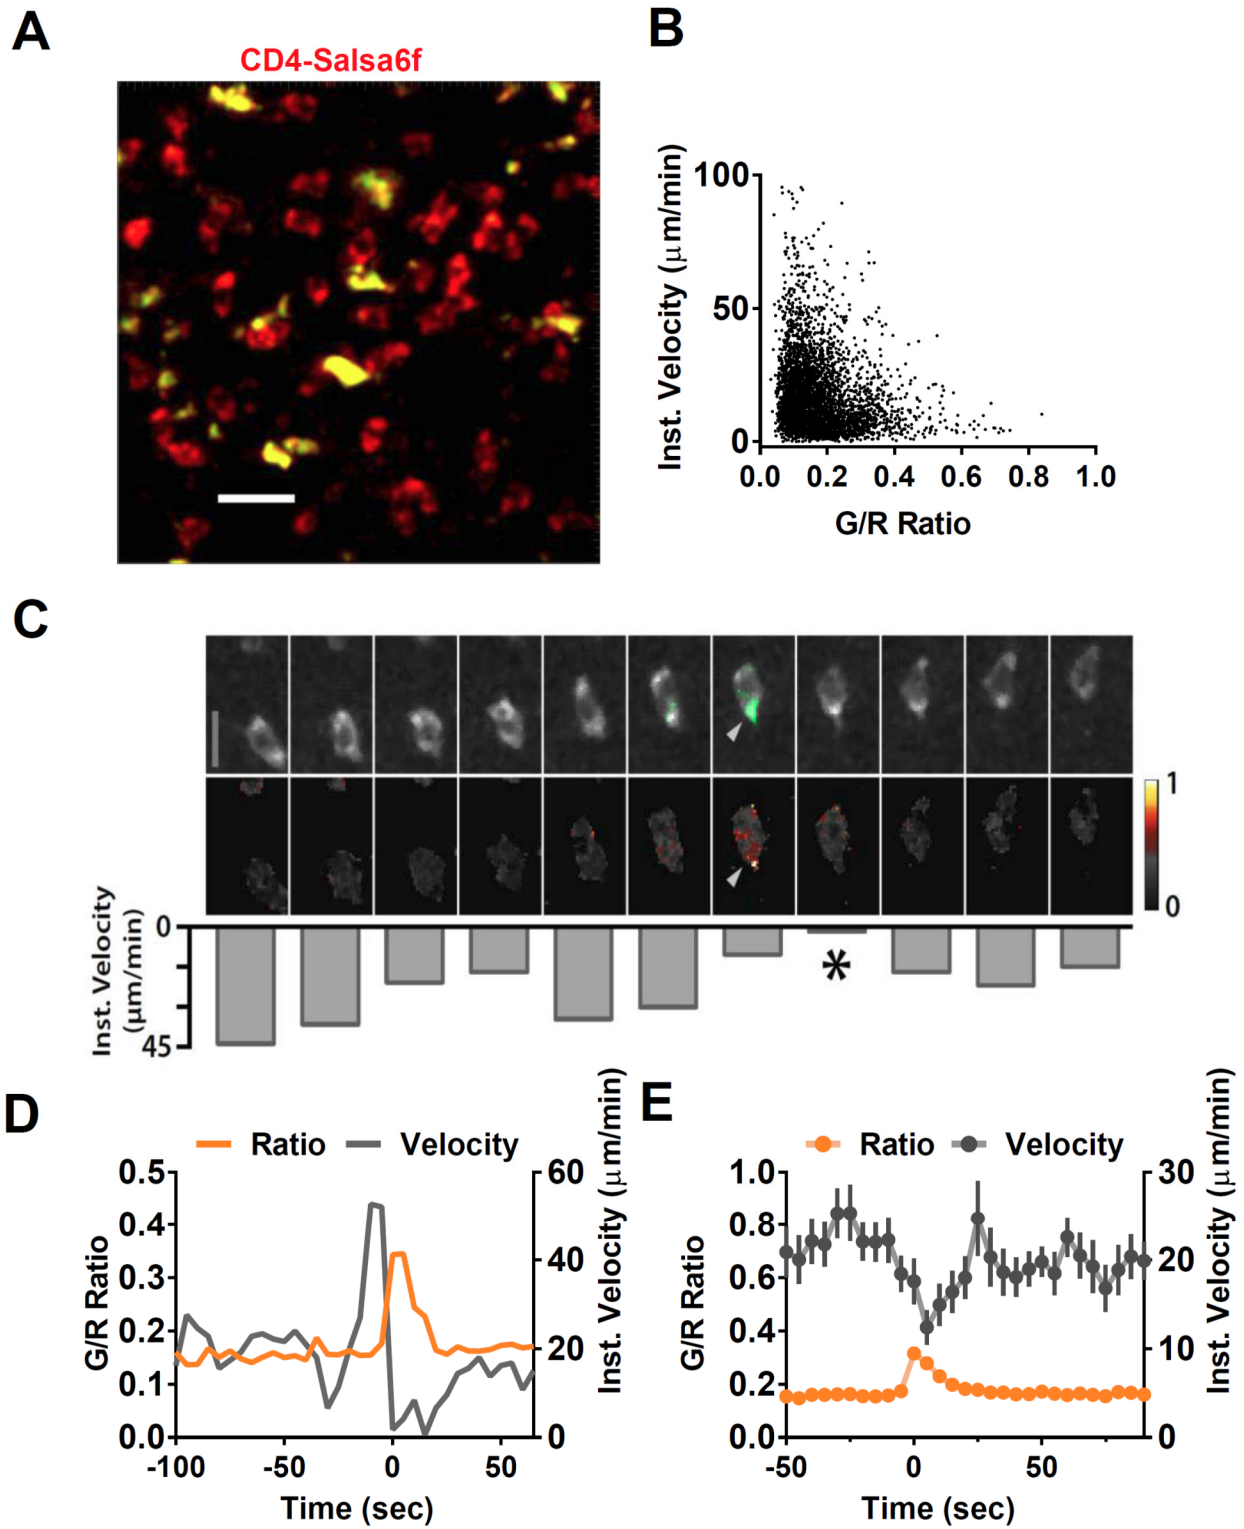

1013

1014

1015 **Figure 8**

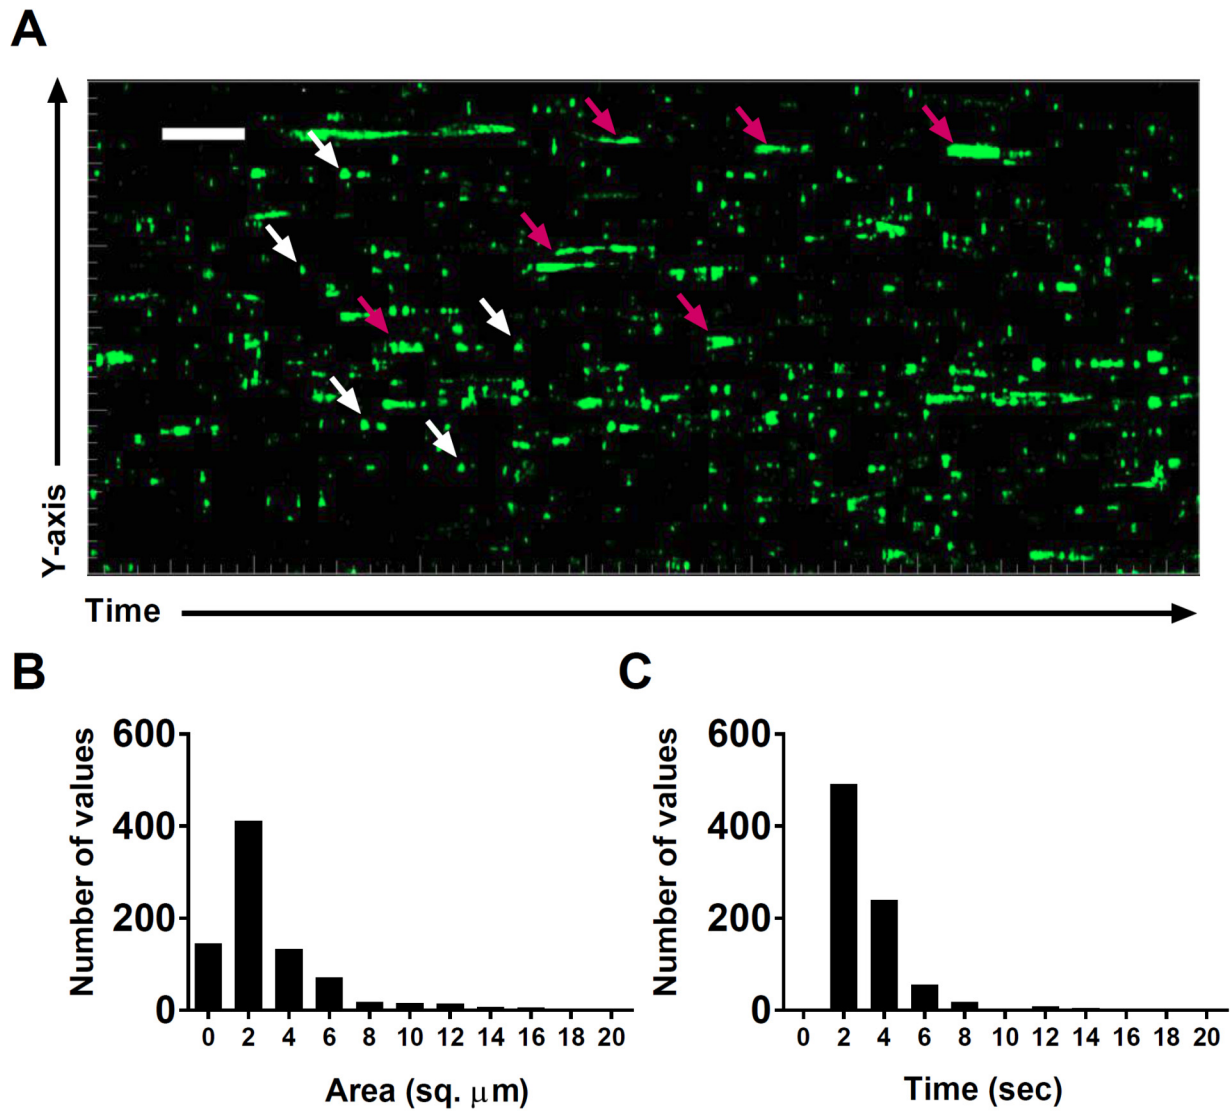

1016

1017

1018 **Figure 9**

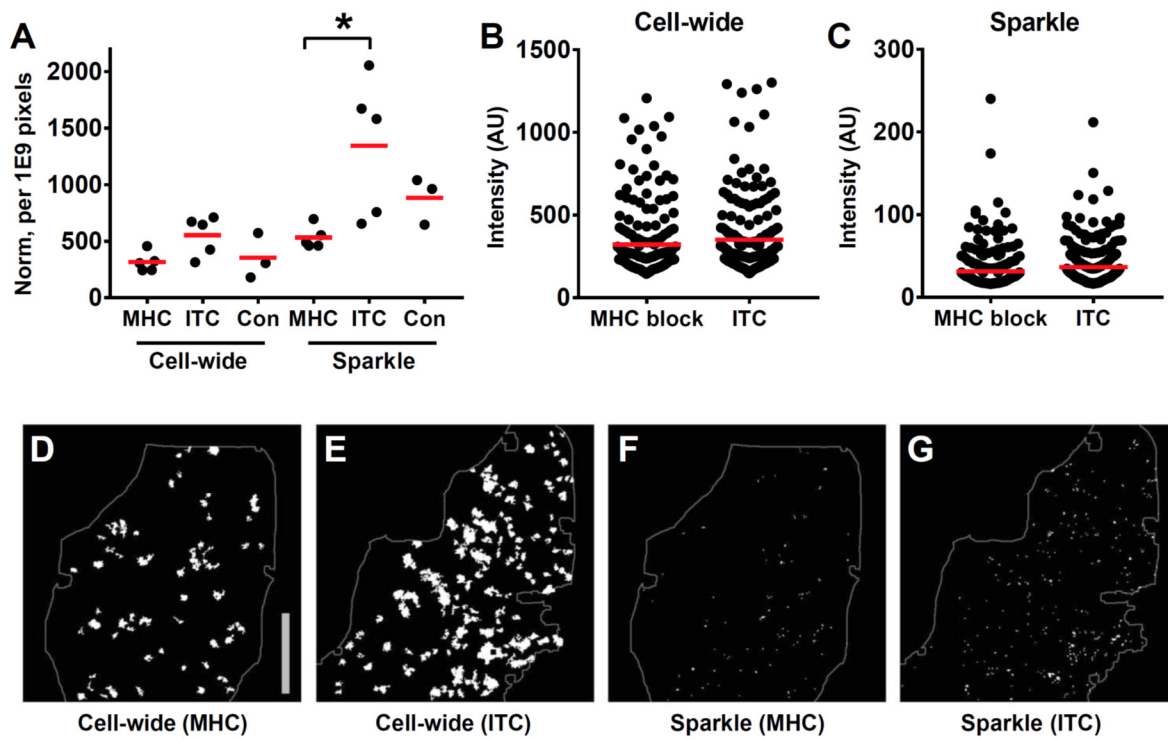

1019

1020

1021 **Video Legends**

1022 **Video 1. Salsa6f-transfected human T cell in confined microchannel.** Merged red  
1023 (tdTomato), green (GCaMP6f), and DIC channels; scale bar = 10  $\mu\text{m}$ , time shown in  
1024 hr:min:sec. This video corresponds to **Figure 4A**.

1025 **Video 2** Salsa6f transfected human T cells in open microchamber, with merged red  
1026 (tdTomato), green (GCaMP6f), and DIC channels, circular structures are support pillars  
1027 part of the PDMS microchamber; scale bar = 10  $\mu\text{m}$ , time shown in hr:min:sec. This video  
1028 corresponds to **Figure 4C**.

1029 **Video 3. Motility of CD4-Salsa6f T cells in lymph node following adoptive transfer.**  
1030 CD4-Cre and CD4-Salsa6f<sup>+/-</sup> cells and their trails are shown in teal and in red,  
1031 respectively. Autofluorescent bodies appear as faint stationary yellow structures. Images  
1032 were acquired at ~11 second interval. Playback speed = 50 frames per second; time  
1033 shown in hr:min:sec. Video corresponds to **Figure 6C**.

1034 **Video 4. Calcium signals in adoptively transferred CD4-Salsa6f T cells.** Red signal  
1035 from tdTomato expression in cytosol facilitates identification and tracking of cells; green  
1036 GCaMP6f signal detects elevation of Ca<sup>2+</sup>. Autofluorescent structures appear as  
1037 stationary yellow bodies. Movie is paused at frame 323, zoomed in to emphasize two  
1038 examples of Ca<sup>2+</sup> transients and an autofluorescent body. Images were acquired at 5  
1039 second interval. Major tick marks at 20  $\mu\text{m}$ . Playback speed = 50 frames per second, time  
1040 shown in hr:min:sec. Video corresponds to **Figure 7A**.

1041 **Video 5. A brief Ca<sup>2+</sup> signal filling the back of a moving adoptively transferred**  
1042 **Salsa6f<sup>++</sup> T cell.** Left: composite of red tdTomato fluorescence pseudocolored grayscale

1043 with green GCaMP6f fluorescence. Right: Corresponding Green/Red ratios, masked to  
1044 red channel as in Fig. 7C. Images acquired at 1 frame every 5 sec and 0.5 microns/pixel.  
1045 Playback speed = 3 frames per second. 0.5  $\mu\text{m}/\text{pixel}$ . Video corresponds to **Figure 7C**.

1046 **Video 6. Calcium transients in steady state lymph nodes.** CD4-Salsa6f<sup>+/+</sup> lymph node  
1047 imaged at 0.5 second interval, processed to visualize Ca<sup>2+</sup> transients (sparkles and cell-  
1048 wide) in green. Red channel is turned off after beginning to facilitate viewing of Ca<sup>2+</sup>  
1049 transients. Autofluorescent structures appear as stationary green bodies. Playback speed  
1050 = 100 frames per second. time shown in hr:min:sec. Video corresponds to **Figure 8A**

1051
